# Supplementary material for: Occasional hybridization between a native and invasive Senecio species in Australia is unlikely to contribute to invasive success
Source: PeerJ. 2017 Aug 15;5:e3630. doi: 10.7717/peerj.3630 (PMC5562138; doi:10.7717/peerj.3630)
Supplement: Data S1 [file peerj-05-3630-s001.xlsx]

## Sheet: Info
All data formatted for Structure (Pritchard, Stephens & Donnelly 2000; Falush, Stephens and Pritchard 2003, 2007; Hubisz, Falush, Stephens and Pritchard 2009)
Error rate optimisation tabs (0%, 1%, 2%, 3%, 4%, 5%, 6%, 7%, 8%, 9%, 10%, 17%)
Contain raw AFLP call data for 38 individuals
Individuals 1-18 = Allopatric Senecio madagascariensis adults from Oxenford
Individuals 19-38 = Allopatric Senecio pinnatifolius 'dune variant' from Southport
Number of loci are as follows:
0% = 33
1% = 56
2% = 79
3% = 96
4% = 112
5% = 128
6% = 142
7% = 154
8% = 165
9% = 175
10% = 184
17% = 233
Full data tab (6%_all_data)
Contains raw data for 340 individuals at 142 AFLP loci (6% error rate) plus 39 microsatellite alleles dominantly coded (observed 0% error rate).
Individuals 1-20 = Allopatric Senecio pinnatifolius 'dune variant' adults from Southport
Individuals 21-40 = Senecio pinnatifolius 'dune variant' adults from Lennox Head
Individuals 41-92 = Senecio pinnatifolius 'dune variant' seeds from Lennox Head
Individuals 93-112 = Senecio pinnatifolius 'dune variant' adults from Ballina
Individuals 113-173 = Senecio pinnatifolius 'dune variant' seeds from Ballina
Individuals 174-191 = Allopatric Senecio madagascariensis adults from Oxenford
Individuals 192-210 = Senecio madagascariensis adults from Lennox Head
Individuals 211-269 = Senecio madagascariensis seeds from Lennox Head
Individuals 270-289 = Senecio madagascariensis adults from Ballina
Individuals 290-340 = Senecio madagascariensis seeds from Ballina
References
Pritchard, J. K., Stephens, M., & Donnelly, P. (2000). Inference of population structure using multilocus genotype data. Genetics, 155(2), 945-959.
Falush, D., Stephens, M., & Pritchard, J. K. (2003). Inference of population structure using multilocus genotype data: linked loci and correlated allele frequencies. Genetics, 164(4), 1567-1587.
Falush, D., Stephens, M., & Pritchard, J. K. (2007). Inference of population structure using multilocus genotype data: dominant markers and null alleles. Molecular ecology notes, 7(4), 574-578.
Hubisz, M. J., Falush, D., Stephens, M., & Pritchard, J. K. (2009). Inferring weak population structure with the assistance of sample group information. Molecular ecology resources, 9(5), 1322-1332.

## Sheet: 0%
Blue29	Red51	Blue55	Yellow67	Red66	Blue60	Red27	Blue33	Blue78	Yellow48	Blue80	Red9	Red28	Blue19	Red35	Blue30	Blue96	Blue23	Red61	Blue102	Blue44	Blue47	Blue31	Yellow45	Red45	Blue94	Blue83	Red68	Red6	Blue99	Red4	Red25	Red55
-9	-9	-9	-9	-9	-9	-9	-9	-9	-9	-9	-9	-9	-9	-9	-9	-9	-9	-9	-9	-9	-9	-9	-9	-9	-9	-9	-9	-9	-9	-9	-9	-9
1	1	-9	1	-9	1	-9	1	-9	1	-9	1	-9	1	-9	2	-9	1	-9	1	-9	1	-9	1	-9	1	-9	2	-9	1	-9	1	-9	1	-9	1	-9	1	-9	1	-9	1	-9	1	-9	1	-9	1	-9	1
2	1	-9	1	-9	2	-9	2	-9	1	-9	1	-9	1	-9	2	-9	1	-9	1	-9	1	-9	1	-9	1	-9	2	-9	1	-9	1	-9	1	-9	1	-9	1	-9	1	-9	1	-9	1	-9	1	-9	1	-9	1
3	1	-9	1	-9	1	-9	1	-9	1	-9	1	-9	1	-9	2	-9	1	-9	1	-9	1	-9	1	-9	1	-9	2	-9	1	-9	1	-9	1	-9	1	-9	1	-9	1	-9	1	-9	1	-9	1	-9	1	-9	1
4	1	-9	1	-9	2	-9	1	-9	1	-9	1	-9	1	-9	2	-9	1	-9	1	-9	1	-9	1	-9	1	-9	2	-9	1	-9	1	-9	1	-9	1	-9	1	-9	1	-9	1	-9	1	-9	1	-9	1	-9	1
5	1	-9	1	-9	2	-9	1	-9	1	-9	1	-9	1	-9	2	-9	1	-9	1	-9	1	-9	1	-9	1	-9	1	-9	1	-9	1	-9	1	-9	1	-9	1	-9	1	-9	1	-9	1	-9	1	-9	1	-9	1
6	1	-9	1	-9	2	-9	1	-9	1	-9	1	-9	1	-9	2	-9	1	-9	1	-9	1	-9	1	-9	1	-9	2	-9	1	-9	1	-9	1	-9	1	-9	1	-9	1	-9	1	-9	1	-9	1	-9	1	-9	1
7	1	-9	1	-9	2	-9	1	-9	1	-9	1	-9	1	-9	2	-9	1	-9	1	-9	1	-9	1	-9	1	-9	2	-9	1	-9	1	-9	1	-9	1	-9	1	-9	1	-9	2	-9	1	-9	1	-9	1	-9	1
8	1	-9	1	-9	2	-9	1	-9	1	-9	1	-9	1	-9	2	-9	1	-9	1	-9	1	-9	1	-9	1	-9	2	-9	1	-9	1	-9	1	-9	1	-9	1	-9	1	-9	1	-9	1	-9	1	-9	1	-9	1
9	1	-9	1	-9	2	-9	1	-9	1	-9	1	-9	1	-9	2	-9	1	-9	1	-9	1	-9	1	-9	1	-9	1	-9	1	-9	1	-9	1	-9	1	-9	1	-9	1	-9	1	-9	1	-9	1	-9	1	-9	1
10	1	-9	1	-9	2	-9	2	-9	1	-9	1	-9	1	-9	2	-9	1	-9	1	-9	1	-9	1	-9	1	-9	1	-9	1	-9	1	-9	1	-9	1	-9	1	-9	1	-9	1	-9	1	-9	1	-9	1	-9	1
11	1	-9	1	-9	1	-9	1	-9	1	-9	1	-9	1	-9	2	-9	1	-9	1	-9	1	-9	1	-9	1	-9	2	-9	1	-9	1	-9	1	-9	1	-9	1	-9	1	-9	1	-9	1	-9	1	-9	1	-9	1
12	1	-9	1	-9	2	-9	1	-9	1	-9	1	-9	1	-9	2	-9	1	-9	1	-9	1	-9	1	-9	1	-9	2	-9	1	-9	1	-9	1	-9	1	-9	1	-9	1	-9	1	-9	1	-9	1	-9	1	-9	1
13	1	-9	1	-9	2	-9	1	-9	1	-9	1	-9	1	-9	2	-9	1	-9	1	-9	1	-9	1	-9	1	-9	2	-9	1	-9	1	-9	1	-9	1	-9	1	-9	1	-9	1	-9	1	-9	1	-9	1	-9	1
14	1	-9	1	-9	2	-9	2	-9	1	-9	1	-9	1	-9	2	-9	1	-9	1	-9	1	-9	1	-9	1	-9	2	-9	1	-9	1	-9	1	-9	1	-9	1	-9	1	-9	1	-9	1	-9	1	-9	1	-9	1
15	1	-9	1	-9	2	-9	1	-9	1	-9	1	-9	1	-9	2	-9	1	-9	2	-9	1	-9	1	-9	1	-9	1	-9	1	-9	1	-9	1	-9	1	-9	1	-9	1	-9	1	-9	1	-9	1	-9	1	-9	1
16	1	-9	1	-9	1	-9	1	-9	1	-9	1	-9	1	-9	2	-9	1	-9	2	-9	1	-9	1	-9	1	-9	2	-9	1	-9	1	-9	1	-9	1	-9	1	-9	1	-9	1	-9	1	-9	1	-9	1	-9	1
17	1	-9	1	-9	2	-9	1	-9	1	-9	1	-9	1	-9	2	-9	1	-9	1	-9	1	-9	1	-9	1	-9	1	-9	1	-9	1	-9	1	-9	1	-9	1	-9	1	-9	1	-9	1	-9	2	-9	1	-9	1
18	1	-9	1	-9	1	-9	1	-9	2	-9	1	-9	1	-9	2	-9	1	-9	1	-9	1	-9	1	-9	1	-9	1	-9	1	-9	1	-9	1	-9	1	-9	1	-9	1	-9	1	-9	1	-9	2	-9	1	-9	1
19	2	-9	1	-9	1	-9	1	-9	1	-9	1	-9	1	-9	2	-9	1	-9	1	-9	1	-9	1	-9	1	-9	2	-9	1	-9	1	-9	1	-9	1	-9	1	-9	1	-9	1	-9	1	-9	1	-9	1	-9	1
20	2	-9	1	-9	1	-9	1	-9	1	-9	1	-9	1	-9	2	-9	1	-9	1	-9	1	-9	1	-9	1	-9	2	-9	1	-9	1	-9	1	-9	1	-9	1	-9	1	-9	1	-9	1	-9	1	-9	1	-9	1
21	2	-9	1	-9	1	-9	1	-9	1	-9	1	-9	1	-9	2	-9	1	-9	1	-9	1	-9	1	-9	1	-9	2	-9	1	-9	1	-9	1	-9	1	-9	1	-9	1	-9	1	-9	1	-9	1	-9	1	-9	1
22	2	-9	1	-9	1	-9	1	-9	1	-9	1	-9	1	-9	2	-9	1	-9	1	-9	1	-9	1	-9	1	-9	2	-9	1	-9	1	-9	1	-9	1	-9	1	-9	1	-9	1	-9	1	-9	1	-9	1	-9	1
23	2	-9	1	-9	1	-9	1	-9	1	-9	1	-9	1	-9	2	-9	1	-9	1	-9	1	-9	1	-9	1	-9	2	-9	1	-9	1	-9	1	-9	1	-9	1	-9	1	-9	1	-9	1	-9	1	-9	1	-9	1
24	2	-9	1	-9	1	-9	1	-9	1	-9	1	-9	1	-9	2	-9	1	-9	1	-9	1	-9	1	-9	1	-9	2	-9	1	-9	1	-9	1	-9	1	-9	1	-9	1	-9	1	-9	1	-9	1	-9	1	-9	1
25	2	-9	1	-9	1	-9	1	-9	1	-9	1	-9	1	-9	2	-9	1	-9	1	-9	1	-9	1	-9	1	-9	2	-9	1	-9	1	-9	1	-9	1	-9	1	-9	1	-9	1	-9	1	-9	1	-9	1	-9	1
26	2	-9	1	-9	1	-9	1	-9	1	-9	1	-9	1	-9	2	-9	1	-9	1	-9	1	-9	1	-9	1	-9	2	-9	1	-9	2	-9	1	-9	1	-9	1	-9	1	-9	1	-9	1	-9	1	-9	1	-9	1
27	2	-9	1	-9	1	-9	1	-9	1	-9	1	-9	1	-9	2	-9	1	-9	1	-9	1	-9	1	-9	1	-9	2	-9	1	-9	1	-9	1	-9	1	-9	1	-9	1	-9	1	-9	1	-9	1	-9	1	-9	1
28	2	-9	1	-9	1	-9	1	-9	1	-9	1	-9	1	-9	2	-9	1	-9	1	-9	1	-9	1	-9	1	-9	2	-9	1	-9	1	-9	1	-9	1	-9	1	-9	1	-9	1	-9	1	-9	1	-9	1	-9	1
29	2	-9	1	-9	1	-9	1	-9	1	-9	1	-9	1	-9	2	-9	1	-9	1	-9	1	-9	1	-9	1	-9	2	-9	1	-9	1	-9	1	-9	1	-9	1	-9	1	-9	1	-9	1	-9	1	-9	1	-9	1
30	2	-9	1	-9	1	-9	1	-9	1	-9	1	-9	1	-9	2	-9	1	-9	1	-9	2	-9	1	-9	1	-9	2	-9	1	-9	1	-9	1	-9	1	-9	1	-9	1	-9	1	-9	1	-9	1	-9	1	-9	1
31	2	-9	1	-9	1	-9	1	-9	1	-9	1	-9	1	-9	2	-9	1	-9	1	-9	1	-9	1	-9	1	-9	2	-9	1	-9	1	-9	1	-9	1	-9	1	-9	1	-9	1	-9	1	-9	1	-9	1	-9	1
32	2	-9	1	-9	1	-9	1	-9	1	-9	1	-9	1	-9	2	-9	1	-9	1	-9	1	-9	1	-9	1	-9	2	-9	1	-9	1	-9	1	-9	1	-9	1	-9	1	-9	1	-9	1	-9	1	-9	1	-9	1
33	2	-9	1	-9	1	-9	1	-9	1	-9	1	-9	1	-9	2	-9	1	-9	2	-9	2	-9	1	-9	1	-9	2	-9	1	-9	1	-9	1	-9	1	-9	1	-9	1	-9	1	-9	1	-9	1	-9	1	-9	1
34	2	-9	1	-9	1	-9	1	-9	1	-9	1	-9	1	-9	2	-9	1	-9	1	-9	1	-9	1	-9	1	-9	1	-9	1	-9	1	-9	1	-9	1	-9	1	-9	1	-9	1	-9	1	-9	1	-9	1	-9	1
35	2	-9	1	-9	1	-9	1	-9	1	-9	1	-9	1	-9	2	-9	1	-9	1	-9	1	-9	1	-9	1	-9	2	-9	1	-9	1	-9	1	-9	1	-9	1	-9	1	-9	1	-9	1	-9	1	-9	1	-9	1
36	2	-9	1	-9	1	-9	1	-9	1	-9	1	-9	1	-9	2	-9	1	-9	1	-9	2	-9	1	-9	1	-9	2	-9	1	-9	1	-9	1	-9	1	-9	1	-9	1	-9	1	-9	1	-9	1	-9	1	-9	1
37	2	-9	1	-9	1	-9	1	-9	1	-9	1	-9	1	-9	2	-9	1	-9	1	-9	1	-9	1	-9	1	-9	2	-9	1	-9	1	-9	1	-9	1	-9	1	-9	1	-9	1	-9	1	-9	1	-9	1	-9	1
38	2	-9	1	-9	1	-9	1	-9	1	-9	1	-9	1	-9	2	-9	1	-9	1	-9	1	-9	1	-9	1	-9	2	-9	1	-9	1	-9	1	-9	1	-9	1	-9	1	-9	1	-9	1	-9	1	-9	1	-9	1
[truncated: 18 more columns]

## Sheet: 1%
Blue29	Red51	Blue55	Yellow67	Red66	Blue60	Red27	Blue33	Blue78	Yellow48	Blue80	Red9	Red28	Blue19	Red35	Blue30	Blue96	Blue23	Red61	Blue102	Blue44	Blue47	Blue31	Yellow45	Red45	Blue94	Blue83	Red68	Red6	Blue99	Red4	Red25	Red55	Red40	Blue100	Red8	Blue53	Red13	Blue84	Yellow70	Yellow36	Red3	Red10	Blue10	Red32	Blue8	Yellow72	Red1	Blue51	Blue45
-9	-9	-9	-9	-9	-9	-9	-9	-9	-9	-9	-9	-9	-9	-9	-9	-9	-9	-9	-9	-9	-9	-9	-9	-9	-9	-9	-9	-9	-9	-9	-9	-9	-9	-9	-9	-9	-9	-9	-9	-9	-9	-9	-9	-9	-9	-9	-9	-9	-9
1	1	-9	1	-9	1	-9	1	-9	1	-9	1	-9	1	-9	2	-9	1	-9	1	-9	1	-9	1	-9	1	-9	2	-9	1	-9	1	-9	1	-9	1	-9	1	-9	1	-9	1	-9	1	-9	1	-9	1	-9	1
2	1	-9	1	-9	2	-9	2	-9	1	-9	1	-9	1	-9	2	-9	1	-9	1	-9	1	-9	1	-9	1	-9	2	-9	1	-9	1	-9	1	-9	1	-9	1	-9	1	-9	1	-9	1	-9	1	-9	1	-9	1
3	1	-9	1	-9	1	-9	1	-9	1	-9	1	-9	1	-9	2	-9	1	-9	1	-9	1	-9	1	-9	1	-9	2	-9	1	-9	1	-9	1	-9	1	-9	1	-9	1	-9	1	-9	1	-9	1	-9	1	-9	1
4	1	-9	1	-9	2	-9	1	-9	1	-9	1	-9	1	-9	2	-9	1	-9	1	-9	1	-9	1	-9	1	-9	2	-9	1	-9	1	-9	1	-9	1	-9	1	-9	1	-9	1	-9	1	-9	1	-9	1	-9	1
5	1	-9	1	-9	2	-9	1	-9	1	-9	1	-9	1	-9	2	-9	1	-9	1	-9	1	-9	1	-9	1	-9	1	-9	1	-9	1	-9	1	-9	1	-9	1	-9	1	-9	1	-9	1	-9	1	-9	1	-9	1
6	1	-9	1	-9	2	-9	1	-9	1	-9	1	-9	1	-9	2	-9	1	-9	1	-9	1	-9	1	-9	1	-9	2	-9	1	-9	1	-9	1	-9	1	-9	1	-9	1	-9	1	-9	1	-9	1	-9	1	-9	1
7	1	-9	1	-9	2	-9	1	-9	1	-9	1	-9	1	-9	2	-9	1	-9	1	-9	1	-9	1	-9	1	-9	2	-9	1	-9	1	-9	1	-9	1	-9	1	-9	1	-9	2	-9	1	-9	1	-9	1	-9	1
8	1	-9	1	-9	2	-9	1	-9	1	-9	1	-9	1	-9	2	-9	1	-9	1	-9	1	-9	1	-9	1	-9	2	-9	1	-9	1	-9	1	-9	1	-9	1	-9	1	-9	1	-9	1	-9	1	-9	1	-9	1
9	1	-9	1	-9	2	-9	1	-9	1	-9	1	-9	1	-9	2	-9	1	-9	1	-9	1	-9	1	-9	1	-9	1	-9	1	-9	1	-9	1	-9	1	-9	1	-9	1	-9	1	-9	1	-9	1	-9	1	-9	1
10	1	-9	1	-9	2	-9	2	-9	1	-9	1	-9	1	-9	2	-9	1	-9	1	-9	1	-9	1	-9	1	-9	1	-9	1	-9	1	-9	1	-9	1	-9	1	-9	1	-9	1	-9	1	-9	1	-9	1	-9	1
11	1	-9	1	-9	1	-9	1	-9	1	-9	1	-9	1	-9	2	-9	1	-9	1	-9	1	-9	1	-9	1	-9	2	-9	1	-9	1	-9	1	-9	1	-9	1	-9	1	-9	1	-9	1	-9	1	-9	1	-9	1
12	1	-9	1	-9	2	-9	1	-9	1	-9	1	-9	1	-9	2	-9	1	-9	1	-9	1	-9	1	-9	1	-9	2	-9	1	-9	1	-9	1	-9	1	-9	1	-9	1	-9	1	-9	1	-9	1	-9	1	-9	1
13	1	-9	1	-9	2	-9	1	-9	1	-9	1	-9	1	-9	2	-9	1	-9	1	-9	1	-9	1	-9	1	-9	2	-9	1	-9	1	-9	1	-9	1	-9	1	-9	1	-9	1	-9	1	-9	1	-9	1	-9	1
14	1	-9	1	-9	2	-9	2	-9	1	-9	1	-9	1	-9	2	-9	1	-9	1	-9	1	-9	1	-9	1	-9	2	-9	1	-9	1	-9	1	-9	1	-9	1	-9	1	-9	1	-9	1	-9	1	-9	1	-9	1
15	1	-9	1	-9	2	-9	1	-9	1	-9	1	-9	1	-9	2	-9	1	-9	2	-9	1	-9	1	-9	1	-9	1	-9	1	-9	1	-9	1	-9	1	-9	1	-9	1	-9	1	-9	1	-9	1	-9	1	-9	1
16	1	-9	1	-9	1	-9	1	-9	1	-9	1	-9	1	-9	2	-9	1	-9	2	-9	1	-9	1	-9	1	-9	2	-9	1	-9	1	-9	1	-9	1	-9	1	-9	1	-9	1	-9	1	-9	1	-9	1	-9	1
17	1	-9	1	-9	2	-9	1	-9	1	-9	1	-9	1	-9	2	-9	1	-9	1	-9	1	-9	1	-9	1	-9	1	-9	1	-9	1	-9	1	-9	1	-9	1	-9	1	-9	1	-9	1	-9	2	-9	1	-9	1
18	1	-9	1	-9	1	-9	1	-9	2	-9	1	-9	1	-9	2	-9	1	-9	1	-9	1	-9	1	-9	1	-9	1	-9	1	-9	1	-9	1	-9	1	-9	1	-9	1	-9	1	-9	1	-9	2	-9	1	-9	1
19	2	-9	1	-9	1	-9	1	-9	1	-9	1	-9	1	-9	2	-9	1	-9	1	-9	1	-9	1	-9	1	-9	2	-9	1	-9	1	-9	1	-9	1	-9	1	-9	1	-9	1	-9	1	-9	1	-9	1	-9	1
20	2	-9	1	-9	1	-9	1	-9	1	-9	1	-9	1	-9	2	-9	1	-9	1	-9	1	-9	1	-9	1	-9	2	-9	1	-9	1	-9	1	-9	1	-9	1	-9	1	-9	1	-9	1	-9	1	-9	1	-9	1
21	2	-9	1	-9	1	-9	1	-9	1	-9	1	-9	1	-9	2	-9	1	-9	1	-9	1	-9	1	-9	1	-9	2	-9	1	-9	1	-9	1	-9	1	-9	1	-9	1	-9	1	-9	1	-9	1	-9	1	-9	1
22	2	-9	1	-9	1	-9	1	-9	1	-9	1	-9	1	-9	2	-9	1	-9	1	-9	1	-9	1	-9	1	-9	2	-9	1	-9	1	-9	1	-9	1	-9	1	-9	1	-9	1	-9	1	-9	1	-9	1	-9	1
23	2	-9	1	-9	1	-9	1	-9	1	-9	1	-9	1	-9	2	-9	1	-9	1	-9	1	-9	1	-9	1	-9	2	-9	1	-9	1	-9	1	-9	1	-9	1	-9	1	-9	1	-9	1	-9	1	-9	1	-9	1
24	2	-9	1	-9	1	-9	1	-9	1	-9	1	-9	1	-9	2	-9	1	-9	1	-9	1	-9	1	-9	1	-9	2	-9	1	-9	1	-9	1	-9	1	-9	1	-9	1	-9	1	-9	1	-9	1	-9	1	-9	1
25	2	-9	1	-9	1	-9	1	-9	1	-9	1	-9	1	-9	2	-9	1	-9	1	-9	1	-9	1	-9	1	-9	2	-9	1	-9	1	-9	1	-9	1	-9	1	-9	1	-9	1	-9	1	-9	1	-9	1	-9	1
26	2	-9	1	-9	1	-9	1	-9	1	-9	1	-9	1	-9	2	-9	1	-9	1	-9	1	-9	1	-9	1	-9	2	-9	1	-9	2	-9	1	-9	1	-9	1	-9	1	-9	1	-9	1	-9	1	-9	1	-9	1
27	2	-9	1	-9	1	-9	1	-9	1	-9	1	-9	1	-9	2	-9	1	-9	1	-9	1	-9	1	-9	1	-9	2	-9	1	-9	1	-9	1	-9	1	-9	1	-9	1	-9	1	-9	1	-9	1	-9	1	-9	1
28	2	-9	1	-9	1	-9	1	-9	1	-9	1	-9	1	-9	2	-9	1	-9	1	-9	1	-9	1	-9	1	-9	2	-9	1	-9	1	-9	1	-9	1	-9	1	-9	1	-9	1	-9	1	-9	1	-9	1	-9	1
29	2	-9	1	-9	1	-9	1	-9	1	-9	1	-9	1	-9	2	-9	1	-9	1	-9	1	-9	1	-9	1	-9	2	-9	1	-9	1	-9	1	-9	1	-9	1	-9	1	-9	1	-9	1	-9	1	-9	1	-9	1
30	2	-9	1	-9	1	-9	1	-9	1	-9	1	-9	1	-9	2	-9	1	-9	1	-9	2	-9	1	-9	1	-9	2	-9	1	-9	1	-9	1	-9	1	-9	1	-9	1	-9	1	-9	1	-9	1	-9	1	-9	1
31	2	-9	1	-9	1	-9	1	-9	1	-9	1	-9	1	-9	2	-9	1	-9	1	-9	1	-9	1	-9	1	-9	2	-9	1	-9	1	-9	1	-9	1	-9	1	-9	1	-9	1	-9	1	-9	1	-9	1	-9	1
32	2	-9	1	-9	1	-9	1	-9	1	-9	1	-9	1	-9	2	-9	1	-9	1	-9	1	-9	1	-9	1	-9	2	-9	1	-9	1	-9	1	-9	1	-9	1	-9	1	-9	1	-9	1	-9	1	-9	1	-9	1
33	2	-9	1	-9	1	-9	1	-9	1	-9	1	-9	1	-9	2	-9	1	-9	2	-9	2	-9	1	-9	1	-9	2	-9	1	-9	1	-9	1	-9	1	-9	1	-9	1	-9	1	-9	1	-9	1	-9	1	-9	1
34	2	-9	1	-9	1	-9	1	-9	1	-9	1	-9	1	-9	2	-9	1	-9	1	-9	1	-9	1	-9	1	-9	1	-9	1	-9	1	-9	1	-9	1	-9	1	-9	1	-9	1	-9	1	-9	1	-9	1	-9	1
35	2	-9	1	-9	1	-9	1	-9	1	-9	1	-9	1	-9	2	-9	1	-9	1	-9	1	-9	1	-9	1	-9	2	-9	1	-9	1	-9	1	-9	1	-9	1	-9	1	-9	1	-9	1	-9	1	-9	1	-9	1
36	2	-9	1	-9	1	-9	1	-9	1	-9	1	-9	1	-9	2	-9	1	-9	1	-9	2	-9	1	-9	1	-9	2	-9	1	-9	1	-9	1	-9	1	-9	1	-9	1	-9	1	-9	1	-9	1	-9	1	-9	1
37	2	-9	1	-9	1	-9	1	-9	1	-9	1	-9	1	-9	2	-9	1	-9	1	-9	1	-9	1	-9	1	-9	2	-9	1	-9	1	-9	1	-9	1	-9	1	-9	1	-9	1	-9	1	-9	1	-9	1	-9	1
38	2	-9	1	-9	1	-9	1	-9	1	-9	1	-9	1	-9	2	-9	1	-9	1	-9	1	-9	1	-9	1	-9	2	-9	1	-9	1	-9	1	-9	1	-9	1	-9	1	-9	1	-9	1	-9	1	-9	1	-9	1
[truncated: 64 more columns]

## Sheet: 2%
Blue29	Red51	Blue55	Yellow67	Red66	Blue60	Red27	Blue33	Blue78	Yellow48	Blue80	Red9	Red28	Blue19	Red35	Blue30	Blue96	Blue23	Red61	Blue102	Blue44	Blue47	Blue31	Yellow45	Red45	Blue94	Blue83	Red68	Red6	Blue99	Red4	Red25	Red55	Red40	Blue100	Red8	Blue53	Red13	Blue84	Yellow70	Yellow36	Red3	Red10	Blue10	Red32	Blue8	Yellow72	Red1	Blue51	Blue45
-9	-9	-9	-9	-9	-9	-9	-9	-9	-9	-9	-9	-9	-9	-9	-9	-9	-9	-9	-9	-9	-9	-9	-9	-9	-9	-9	-9	-9	-9	-9	-9	-9	-9	-9	-9	-9	-9	-9	-9	-9	-9	-9	-9	-9	-9	-9	-9	-9	-9
1	1	-9	1	-9	1	-9	1	-9	1	-9	1	-9	1	-9	2	-9	1	-9	1	-9	1	-9	1	-9	1	-9	2	-9	1	-9	1	-9	1	-9	1	-9	1	-9	1	-9	1	-9	1	-9	1	-9	1	-9	1
2	1	-9	1	-9	2	-9	2	-9	1	-9	1	-9	1	-9	2	-9	1	-9	1	-9	1	-9	1	-9	1	-9	2	-9	1	-9	1	-9	1	-9	1	-9	1	-9	1	-9	1	-9	1	-9	1	-9	1	-9	1
3	1	-9	1	-9	1	-9	1	-9	1	-9	1	-9	1	-9	2	-9	1	-9	1	-9	1	-9	1	-9	1	-9	2	-9	1	-9	1	-9	1	-9	1	-9	1	-9	1	-9	1	-9	1	-9	1	-9	1	-9	1
4	1	-9	1	-9	2	-9	1	-9	1	-9	1	-9	1	-9	2	-9	1	-9	1	-9	1	-9	1	-9	1	-9	2	-9	1	-9	1	-9	1	-9	1	-9	1	-9	1	-9	1	-9	1	-9	1	-9	1	-9	1
5	1	-9	1	-9	2	-9	1	-9	1	-9	1	-9	1	-9	2	-9	1	-9	1	-9	1	-9	1	-9	1	-9	1	-9	1	-9	1	-9	1	-9	1	-9	1	-9	1	-9	1	-9	1	-9	1	-9	1	-9	1
6	1	-9	1	-9	2	-9	1	-9	1	-9	1	-9	1	-9	2	-9	1	-9	1	-9	1	-9	1	-9	1	-9	2	-9	1	-9	1	-9	1	-9	1	-9	1	-9	1	-9	1	-9	1	-9	1	-9	1	-9	1
7	1	-9	1	-9	2	-9	1	-9	1	-9	1	-9	1	-9	2	-9	1	-9	1	-9	1	-9	1	-9	1	-9	2	-9	1	-9	1	-9	1	-9	1	-9	1	-9	1	-9	2	-9	1	-9	1	-9	1	-9	1
8	1	-9	1	-9	2	-9	1	-9	1	-9	1	-9	1	-9	2	-9	1	-9	1	-9	1	-9	1	-9	1	-9	2	-9	1	-9	1	-9	1	-9	1	-9	1	-9	1	-9	1	-9	1	-9	1	-9	1	-9	1
9	1	-9	1	-9	2	-9	1	-9	1	-9	1	-9	1	-9	2	-9	1	-9	1	-9	1	-9	1	-9	1	-9	1	-9	1	-9	1	-9	1	-9	1	-9	1	-9	1	-9	1	-9	1	-9	1	-9	1	-9	1
10	1	-9	1	-9	2	-9	2	-9	1	-9	1	-9	1	-9	2	-9	1	-9	1	-9	1	-9	1	-9	1	-9	1	-9	1	-9	1	-9	1	-9	1	-9	1	-9	1	-9	1	-9	1	-9	1	-9	1	-9	1
11	1	-9	1	-9	1	-9	1	-9	1	-9	1	-9	1	-9	2	-9	1	-9	1	-9	1	-9	1	-9	1	-9	2	-9	1	-9	1	-9	1	-9	1	-9	1	-9	1	-9	1	-9	1	-9	1	-9	1	-9	1
12	1	-9	1	-9	2	-9	1	-9	1	-9	1	-9	1	-9	2	-9	1	-9	1	-9	1	-9	1	-9	1	-9	2	-9	1	-9	1	-9	1	-9	1	-9	1	-9	1	-9	1	-9	1	-9	1	-9	1	-9	1
13	1	-9	1	-9	2	-9	1	-9	1	-9	1	-9	1	-9	2	-9	1	-9	1	-9	1	-9	1	-9	1	-9	2	-9	1	-9	1	-9	1	-9	1	-9	1	-9	1	-9	1	-9	1	-9	1	-9	1	-9	1
14	1	-9	1	-9	2	-9	2	-9	1	-9	1	-9	1	-9	2	-9	1	-9	1	-9	1	-9	1	-9	1	-9	2	-9	1	-9	1	-9	1	-9	1	-9	1	-9	1	-9	1	-9	1	-9	1	-9	1	-9	1
15	1	-9	1	-9	2	-9	1	-9	1	-9	1	-9	1	-9	2	-9	1	-9	2	-9	1	-9	1	-9	1	-9	1	-9	1	-9	1	-9	1	-9	1	-9	1	-9	1	-9	1	-9	1	-9	1	-9	1	-9	1
16	1	-9	1	-9	1	-9	1	-9	1	-9	1	-9	1	-9	2	-9	1	-9	2	-9	1	-9	1	-9	1	-9	2	-9	1	-9	1	-9	1	-9	1	-9	1	-9	1	-9	1	-9	1	-9	1	-9	1	-9	1
17	1	-9	1	-9	2	-9	1	-9	1	-9	1	-9	1	-9	2	-9	1	-9	1	-9	1	-9	1	-9	1	-9	1	-9	1	-9	1	-9	1	-9	1	-9	1	-9	1	-9	1	-9	1	-9	2	-9	1	-9	1
18	1	-9	1	-9	1	-9	1	-9	2	-9	1	-9	1	-9	2	-9	1	-9	1	-9	1	-9	1	-9	1	-9	1	-9	1	-9	1	-9	1	-9	1	-9	1	-9	1	-9	1	-9	1	-9	2	-9	1	-9	1
19	2	-9	1	-9	1	-9	1	-9	1	-9	1	-9	1	-9	2	-9	1	-9	1	-9	1	-9	1	-9	1	-9	2	-9	1	-9	1	-9	1	-9	1	-9	1	-9	1	-9	1	-9	1	-9	1	-9	1	-9	1
20	2	-9	1	-9	1	-9	1	-9	1	-9	1	-9	1	-9	2	-9	1	-9	1	-9	1	-9	1	-9	1	-9	2	-9	1	-9	1	-9	1	-9	1	-9	1	-9	1	-9	1	-9	1	-9	1	-9	1	-9	1
21	2	-9	1	-9	1	-9	1	-9	1	-9	1	-9	1	-9	2	-9	1	-9	1	-9	1	-9	1	-9	1	-9	2	-9	1	-9	1	-9	1	-9	1	-9	1	-9	1	-9	1	-9	1	-9	1	-9	1	-9	1
22	2	-9	1	-9	1	-9	1	-9	1	-9	1	-9	1	-9	2	-9	1	-9	1	-9	1	-9	1	-9	1	-9	2	-9	1	-9	1	-9	1	-9	1	-9	1	-9	1	-9	1	-9	1	-9	1	-9	1	-9	1
23	2	-9	1	-9	1	-9	1	-9	1	-9	1	-9	1	-9	2	-9	1	-9	1	-9	1	-9	1	-9	1	-9	2	-9	1	-9	1	-9	1	-9	1	-9	1	-9	1	-9	1	-9	1	-9	1	-9	1	-9	1
24	2	-9	1	-9	1	-9	1	-9	1	-9	1	-9	1	-9	2	-9	1	-9	1	-9	1	-9	1	-9	1	-9	2	-9	1	-9	1	-9	1	-9	1	-9	1	-9	1	-9	1	-9	1	-9	1	-9	1	-9	1
25	2	-9	1	-9	1	-9	1	-9	1	-9	1	-9	1	-9	2	-9	1	-9	1	-9	1	-9	1	-9	1	-9	2	-9	1	-9	1	-9	1	-9	1	-9	1	-9	1	-9	1	-9	1	-9	1	-9	1	-9	1
26	2	-9	1	-9	1	-9	1	-9	1	-9	1	-9	1	-9	2	-9	1	-9	1	-9	1	-9	1	-9	1	-9	2	-9	1	-9	2	-9	1	-9	1	-9	1	-9	1	-9	1	-9	1	-9	1	-9	1	-9	1
27	2	-9	1	-9	1	-9	1	-9	1	-9	1	-9	1	-9	2	-9	1	-9	1	-9	1	-9	1	-9	1	-9	2	-9	1	-9	1	-9	1	-9	1	-9	1	-9	1	-9	1	-9	1	-9	1	-9	1	-9	1
28	2	-9	1	-9	1	-9	1	-9	1	-9	1	-9	1	-9	2	-9	1	-9	1	-9	1	-9	1	-9	1	-9	2	-9	1	-9	1	-9	1	-9	1	-9	1	-9	1	-9	1	-9	1	-9	1	-9	1	-9	1
29	2	-9	1	-9	1	-9	1	-9	1	-9	1	-9	1	-9	2	-9	1	-9	1	-9	1	-9	1	-9	1	-9	2	-9	1	-9	1	-9	1	-9	1	-9	1	-9	1	-9	1	-9	1	-9	1	-9	1	-9	1
30	2	-9	1	-9	1	-9	1	-9	1	-9	1	-9	1	-9	2	-9	1	-9	1	-9	2	-9	1	-9	1	-9	2	-9	1	-9	1	-9	1	-9	1	-9	1	-9	1	-9	1	-9	1	-9	1	-9	1	-9	1
31	2	-9	1	-9	1	-9	1	-9	1	-9	1	-9	1	-9	2	-9	1	-9	1	-9	1	-9	1	-9	1	-9	2	-9	1	-9	1	-9	1	-9	1	-9	1	-9	1	-9	1	-9	1	-9	1	-9	1	-9	1
32	2	-9	1	-9	1	-9	1	-9	1	-9	1	-9	1	-9	2	-9	1	-9	1	-9	1	-9	1	-9	1	-9	2	-9	1	-9	1	-9	1	-9	1	-9	1	-9	1	-9	1	-9	1	-9	1	-9	1	-9	1
33	2	-9	1	-9	1	-9	1	-9	1	-9	1	-9	1	-9	2	-9	1	-9	2	-9	2	-9	1	-9	1	-9	2	-9	1	-9	1	-9	1	-9	1	-9	1	-9	1	-9	1	-9	1	-9	1	-9	1	-9	1
34	2	-9	1	-9	1	-9	1	-9	1	-9	1	-9	1	-9	2	-9	1	-9	1	-9	1	-9	1	-9	1	-9	1	-9	1	-9	1	-9	1	-9	1	-9	1	-9	1	-9	1	-9	1	-9	1	-9	1	-9	1
35	2	-9	1	-9	1	-9	1	-9	1	-9	1	-9	1	-9	2	-9	1	-9	1	-9	1	-9	1	-9	1	-9	2	-9	1	-9	1	-9	1	-9	1	-9	1	-9	1	-9	1	-9	1	-9	1	-9	1	-9	1
36	2	-9	1	-9	1	-9	1	-9	1	-9	1	-9	1	-9	2	-9	1	-9	1	-9	2	-9	1	-9	1	-9	2	-9	1	-9	1	-9	1	-9	1	-9	1	-9	1	-9	1	-9	1	-9	1	-9	1	-9	1
37	2	-9	1	-9	1	-9	1	-9	1	-9	1	-9	1	-9	2	-9	1	-9	1	-9	1	-9	1	-9	1	-9	2	-9	1	-9	1	-9	1	-9	1	-9	1	-9	1	-9	1	-9	1	-9	1	-9	1	-9	1
38	2	-9	1	-9	1	-9	1	-9	1	-9	1	-9	1	-9	2	-9	1	-9	1	-9	1	-9	1	-9	1	-9	2	-9	1	-9	1	-9	1	-9	1	-9	1	-9	1	-9	1	-9	1	-9	1	-9	1	-9	1
[truncated: 110 more columns]

## Sheet: 3%
Blue29	Red51	Blue55	Yellow67	Red66	Blue60	Red27	Blue33	Blue78	Yellow48	Blue80	Red9	Red28	Blue19	Red35	Blue30	Blue96	Blue23	Red61	Blue102	Blue44	Blue47	Blue31	Yellow45	Red45	Blue94	Blue83	Red68	Red6	Blue99	Red4	Red25	Red55	Red40	Blue100	Red8	Blue53	Red13	Blue84	Yellow70	Yellow36	Red3	Red10	Blue10	Red32	Blue8	Yellow72	Red1	Blue51	Blue45
-9	-9	-9	-9	-9	-9	-9	-9	-9	-9	-9	-9	-9	-9	-9	-9	-9	-9	-9	-9	-9	-9	-9	-9	-9	-9	-9	-9	-9	-9	-9	-9	-9	-9	-9	-9	-9	-9	-9	-9	-9	-9	-9	-9	-9	-9	-9	-9	-9	-9
1	1	-9	1	-9	1	-9	1	-9	1	-9	1	-9	1	-9	2	-9	1	-9	1	-9	1	-9	1	-9	1	-9	2	-9	1	-9	1	-9	1	-9	1	-9	1	-9	1	-9	1	-9	1	-9	1	-9	1	-9	1
2	1	-9	1	-9	2	-9	2	-9	1	-9	1	-9	1	-9	2	-9	1	-9	1	-9	1	-9	1	-9	1	-9	2	-9	1	-9	1	-9	1	-9	1	-9	1	-9	1	-9	1	-9	1	-9	1	-9	1	-9	1
3	1	-9	1	-9	1	-9	1	-9	1	-9	1	-9	1	-9	2	-9	1	-9	1	-9	1	-9	1	-9	1	-9	2	-9	1	-9	1	-9	1	-9	1	-9	1	-9	1	-9	1	-9	1	-9	1	-9	1	-9	1
4	1	-9	1	-9	2	-9	1	-9	1	-9	1	-9	1	-9	2	-9	1	-9	1	-9	1	-9	1	-9	1	-9	2	-9	1	-9	1	-9	1	-9	1	-9	1	-9	1	-9	1	-9	1	-9	1	-9	1	-9	1
5	1	-9	1	-9	2	-9	1	-9	1	-9	1	-9	1	-9	2	-9	1	-9	1	-9	1	-9	1	-9	1	-9	1	-9	1	-9	1	-9	1	-9	1	-9	1	-9	1	-9	1	-9	1	-9	1	-9	1	-9	1
6	1	-9	1	-9	2	-9	1	-9	1	-9	1	-9	1	-9	2	-9	1	-9	1	-9	1	-9	1	-9	1	-9	2	-9	1	-9	1	-9	1	-9	1	-9	1	-9	1	-9	1	-9	1	-9	1	-9	1	-9	1
7	1	-9	1	-9	2	-9	1	-9	1	-9	1	-9	1	-9	2	-9	1	-9	1	-9	1	-9	1	-9	1	-9	2	-9	1	-9	1	-9	1	-9	1	-9	1	-9	1	-9	2	-9	1	-9	1	-9	1	-9	1
8	1	-9	1	-9	2	-9	1	-9	1	-9	1	-9	1	-9	2	-9	1	-9	1	-9	1	-9	1	-9	1	-9	2	-9	1	-9	1	-9	1	-9	1	-9	1	-9	1	-9	1	-9	1	-9	1	-9	1	-9	1
9	1	-9	1	-9	2	-9	1	-9	1	-9	1	-9	1	-9	2	-9	1	-9	1	-9	1	-9	1	-9	1	-9	1	-9	1	-9	1	-9	1	-9	1	-9	1	-9	1	-9	1	-9	1	-9	1	-9	1	-9	1
10	1	-9	1	-9	2	-9	2	-9	1	-9	1	-9	1	-9	2	-9	1	-9	1	-9	1	-9	1	-9	1	-9	1	-9	1	-9	1	-9	1	-9	1	-9	1	-9	1	-9	1	-9	1	-9	1	-9	1	-9	1
11	1	-9	1	-9	1	-9	1	-9	1	-9	1	-9	1	-9	2	-9	1	-9	1	-9	1	-9	1	-9	1	-9	2	-9	1	-9	1	-9	1	-9	1	-9	1	-9	1	-9	1	-9	1	-9	1	-9	1	-9	1
12	1	-9	1	-9	2	-9	1	-9	1	-9	1	-9	1	-9	2	-9	1	-9	1	-9	1	-9	1	-9	1	-9	2	-9	1	-9	1	-9	1	-9	1	-9	1	-9	1	-9	1	-9	1	-9	1	-9	1	-9	1
13	1	-9	1	-9	2	-9	1	-9	1	-9	1	-9	1	-9	2	-9	1	-9	1	-9	1	-9	1	-9	1	-9	2	-9	1	-9	1	-9	1	-9	1	-9	1	-9	1	-9	1	-9	1	-9	1	-9	1	-9	1
14	1	-9	1	-9	2	-9	2	-9	1	-9	1	-9	1	-9	2	-9	1	-9	1	-9	1	-9	1	-9	1	-9	2	-9	1	-9	1	-9	1	-9	1	-9	1	-9	1	-9	1	-9	1	-9	1	-9	1	-9	1
15	1	-9	1	-9	2	-9	1	-9	1	-9	1	-9	1	-9	2	-9	1	-9	2	-9	1	-9	1	-9	1	-9	1	-9	1	-9	1	-9	1	-9	1	-9	1	-9	1	-9	1	-9	1	-9	1	-9	1	-9	1
16	1	-9	1	-9	1	-9	1	-9	1	-9	1	-9	1	-9	2	-9	1	-9	2	-9	1	-9	1	-9	1	-9	2	-9	1	-9	1	-9	1	-9	1	-9	1	-9	1	-9	1	-9	1	-9	1	-9	1	-9	1
17	1	-9	1	-9	2	-9	1	-9	1	-9	1	-9	1	-9	2	-9	1	-9	1	-9	1	-9	1	-9	1	-9	1	-9	1	-9	1	-9	1	-9	1	-9	1	-9	1	-9	1	-9	1	-9	2	-9	1	-9	1
18	1	-9	1	-9	1	-9	1	-9	2	-9	1	-9	1	-9	2	-9	1	-9	1	-9	1	-9	1	-9	1	-9	1	-9	1	-9	1	-9	1	-9	1	-9	1	-9	1	-9	1	-9	1	-9	2	-9	1	-9	1
19	2	-9	1	-9	1	-9	1	-9	1	-9	1	-9	1	-9	2	-9	1	-9	1	-9	1	-9	1	-9	1	-9	2	-9	1	-9	1	-9	1	-9	1	-9	1	-9	1	-9	1	-9	1	-9	1	-9	1	-9	1
20	2	-9	1	-9	1	-9	1	-9	1	-9	1	-9	1	-9	2	-9	1	-9	1	-9	1	-9	1	-9	1	-9	2	-9	1	-9	1	-9	1	-9	1	-9	1	-9	1	-9	1	-9	1	-9	1	-9	1	-9	1
21	2	-9	1	-9	1	-9	1	-9	1	-9	1	-9	1	-9	2	-9	1	-9	1	-9	1	-9	1	-9	1	-9	2	-9	1	-9	1	-9	1	-9	1	-9	1	-9	1	-9	1	-9	1	-9	1	-9	1	-9	1
22	2	-9	1	-9	1	-9	1	-9	1	-9	1	-9	1	-9	2	-9	1	-9	1	-9	1	-9	1	-9	1	-9	2	-9	1	-9	1	-9	1	-9	1	-9	1	-9	1	-9	1	-9	1	-9	1	-9	1	-9	1
23	2	-9	1	-9	1	-9	1	-9	1	-9	1	-9	1	-9	2	-9	1	-9	1	-9	1	-9	1	-9	1	-9	2	-9	1	-9	1	-9	1	-9	1	-9	1	-9	1	-9	1	-9	1	-9	1	-9	1	-9	1
24	2	-9	1	-9	1	-9	1	-9	1	-9	1	-9	1	-9	2	-9	1	-9	1	-9	1	-9	1	-9	1	-9	2	-9	1	-9	1	-9	1	-9	1	-9	1	-9	1	-9	1	-9	1	-9	1	-9	1	-9	1
25	2	-9	1	-9	1	-9	1	-9	1	-9	1	-9	1	-9	2	-9	1	-9	1	-9	1	-9	1	-9	1	-9	2	-9	1	-9	1	-9	1	-9	1	-9	1	-9	1	-9	1	-9	1	-9	1	-9	1	-9	1
26	2	-9	1	-9	1	-9	1	-9	1	-9	1	-9	1	-9	2	-9	1	-9	1	-9	1	-9	1	-9	1	-9	2	-9	1	-9	2	-9	1	-9	1	-9	1	-9	1	-9	1	-9	1	-9	1	-9	1	-9	1
27	2	-9	1	-9	1	-9	1	-9	1	-9	1	-9	1	-9	2	-9	1	-9	1	-9	1	-9	1	-9	1	-9	2	-9	1	-9	1	-9	1	-9	1	-9	1	-9	1	-9	1	-9	1	-9	1	-9	1	-9	1
28	2	-9	1	-9	1	-9	1	-9	1	-9	1	-9	1	-9	2	-9	1	-9	1	-9	1	-9	1	-9	1	-9	2	-9	1	-9	1	-9	1	-9	1	-9	1	-9	1	-9	1	-9	1	-9	1	-9	1	-9	1
29	2	-9	1	-9	1	-9	1	-9	1	-9	1	-9	1	-9	2	-9	1	-9	1	-9	1	-9	1	-9	1	-9	2	-9	1	-9	1	-9	1	-9	1	-9	1	-9	1	-9	1	-9	1	-9	1	-9	1	-9	1
30	2	-9	1	-9	1	-9	1	-9	1	-9	1	-9	1	-9	2	-9	1	-9	1	-9	2	-9	1	-9	1	-9	2	-9	1	-9	1	-9	1	-9	1	-9	1	-9	1	-9	1	-9	1	-9	1	-9	1	-9	1
31	2	-9	1	-9	1	-9	1	-9	1	-9	1	-9	1	-9	2	-9	1	-9	1	-9	1	-9	1	-9	1	-9	2	-9	1	-9	1	-9	1	-9	1	-9	1	-9	1	-9	1	-9	1	-9	1	-9	1	-9	1
32	2	-9	1	-9	1	-9	1	-9	1	-9	1	-9	1	-9	2	-9	1	-9	1	-9	1	-9	1	-9	1	-9	2	-9	1	-9	1	-9	1	-9	1	-9	1	-9	1	-9	1	-9	1	-9	1	-9	1	-9	1
33	2	-9	1	-9	1	-9	1	-9	1	-9	1	-9	1	-9	2	-9	1	-9	2	-9	2	-9	1	-9	1	-9	2	-9	1	-9	1	-9	1	-9	1	-9	1	-9	1	-9	1	-9	1	-9	1	-9	1	-9	1
34	2	-9	1	-9	1	-9	1	-9	1	-9	1	-9	1	-9	2	-9	1	-9	1	-9	1	-9	1	-9	1	-9	1	-9	1	-9	1	-9	1	-9	1	-9	1	-9	1	-9	1	-9	1	-9	1	-9	1	-9	1
35	2	-9	1	-9	1	-9	1	-9	1	-9	1	-9	1	-9	2	-9	1	-9	1	-9	1	-9	1	-9	1	-9	2	-9	1	-9	1	-9	1	-9	1	-9	1	-9	1	-9	1	-9	1	-9	1	-9	1	-9	1
36	2	-9	1	-9	1	-9	1	-9	1	-9	1	-9	1	-9	2	-9	1	-9	1	-9	2	-9	1	-9	1	-9	2	-9	1	-9	1	-9	1	-9	1	-9	1	-9	1	-9	1	-9	1	-9	1	-9	1	-9	1
37	2	-9	1	-9	1	-9	1	-9	1	-9	1	-9	1	-9	2	-9	1	-9	1	-9	1	-9	1	-9	1	-9	2	-9	1	-9	1	-9	1	-9	1	-9	1	-9	1	-9	1	-9	1	-9	1	-9	1	-9	1
38	2	-9	1	-9	1	-9	1	-9	1	-9	1	-9	1	-9	2	-9	1	-9	1	-9	1	-9	1	-9	1	-9	2	-9	1	-9	1	-9	1	-9	1	-9	1	-9	1	-9	1	-9	1	-9	1	-9	1	-9	1
[truncated: 144 more columns]

## Sheet: 4%
Blue29	Red51	Blue55	Yellow67	Red66	Blue60	Red27	Blue33	Blue78	Yellow48	Blue80	Red9	Red28	Blue19	Red35	Blue30	Blue96	Blue23	Red61	Blue102	Blue44	Blue47	Blue31	Yellow45	Red45	Blue94	Blue83	Red68	Red6	Blue99	Red4	Red25	Red55	Red40	Blue100	Red8	Blue53	Red13	Blue84	Yellow70	Yellow36	Red3	Red10	Blue10	Red32	Blue8	Yellow72	Red1	Blue51	Blue45
-9	-9	-9	-9	-9	-9	-9	-9	-9	-9	-9	-9	-9	-9	-9	-9	-9	-9	-9	-9	-9	-9	-9	-9	-9	-9	-9	-9	-9	-9	-9	-9	-9	-9	-9	-9	-9	-9	-9	-9	-9	-9	-9	-9	-9	-9	-9	-9	-9	-9
1	1	-9	1	-9	1	-9	1	-9	1	-9	1	-9	1	-9	2	-9	1	-9	1	-9	1	-9	1	-9	1	-9	2	-9	1	-9	1	-9	1	-9	1	-9	1	-9	1	-9	1	-9	1	-9	1	-9	1	-9	1
2	1	-9	1	-9	2	-9	2	-9	1	-9	1	-9	1	-9	2	-9	1	-9	1	-9	1	-9	1	-9	1	-9	2	-9	1	-9	1	-9	1	-9	1	-9	1	-9	1	-9	1	-9	1	-9	1	-9	1	-9	1
3	1	-9	1	-9	1	-9	1	-9	1	-9	1	-9	1	-9	2	-9	1	-9	1	-9	1	-9	1	-9	1	-9	2	-9	1	-9	1	-9	1	-9	1	-9	1	-9	1	-9	1	-9	1	-9	1	-9	1	-9	1
4	1	-9	1	-9	2	-9	1	-9	1	-9	1	-9	1	-9	2	-9	1	-9	1	-9	1	-9	1	-9	1	-9	2	-9	1	-9	1	-9	1	-9	1	-9	1	-9	1	-9	1	-9	1	-9	1	-9	1	-9	1
5	1	-9	1	-9	2	-9	1	-9	1	-9	1	-9	1	-9	2	-9	1	-9	1	-9	1	-9	1	-9	1	-9	1	-9	1	-9	1	-9	1	-9	1	-9	1	-9	1	-9	1	-9	1	-9	1	-9	1	-9	1
6	1	-9	1	-9	2	-9	1	-9	1	-9	1	-9	1	-9	2	-9	1	-9	1	-9	1	-9	1	-9	1	-9	2	-9	1	-9	1	-9	1	-9	1	-9	1	-9	1	-9	1	-9	1	-9	1	-9	1	-9	1
7	1	-9	1	-9	2	-9	1	-9	1	-9	1	-9	1	-9	2	-9	1	-9	1	-9	1	-9	1	-9	1	-9	2	-9	1	-9	1	-9	1	-9	1	-9	1	-9	1	-9	2	-9	1	-9	1	-9	1	-9	1
8	1	-9	1	-9	2	-9	1	-9	1	-9	1	-9	1	-9	2	-9	1	-9	1	-9	1	-9	1	-9	1	-9	2	-9	1	-9	1	-9	1	-9	1	-9	1	-9	1	-9	1	-9	1	-9	1	-9	1	-9	1
9	1	-9	1	-9	2	-9	1	-9	1	-9	1	-9	1	-9	2	-9	1	-9	1	-9	1	-9	1	-9	1	-9	1	-9	1	-9	1	-9	1	-9	1	-9	1	-9	1	-9	1	-9	1	-9	1	-9	1	-9	1
10	1	-9	1	-9	2	-9	2	-9	1	-9	1	-9	1	-9	2	-9	1	-9	1	-9	1	-9	1	-9	1	-9	1	-9	1	-9	1	-9	1	-9	1	-9	1	-9	1	-9	1	-9	1	-9	1	-9	1	-9	1
11	1	-9	1	-9	1	-9	1	-9	1	-9	1	-9	1	-9	2	-9	1	-9	1	-9	1	-9	1	-9	1	-9	2	-9	1	-9	1	-9	1	-9	1	-9	1	-9	1	-9	1	-9	1	-9	1	-9	1	-9	1
12	1	-9	1	-9	2	-9	1	-9	1	-9	1	-9	1	-9	2	-9	1	-9	1	-9	1	-9	1	-9	1	-9	2	-9	1	-9	1	-9	1	-9	1	-9	1	-9	1	-9	1	-9	1	-9	1	-9	1	-9	1
13	1	-9	1	-9	2	-9	1	-9	1	-9	1	-9	1	-9	2	-9	1	-9	1	-9	1	-9	1	-9	1	-9	2	-9	1	-9	1	-9	1	-9	1	-9	1	-9	1	-9	1	-9	1	-9	1	-9	1	-9	1
14	1	-9	1	-9	2	-9	2	-9	1	-9	1	-9	1	-9	2	-9	1	-9	1	-9	1	-9	1	-9	1	-9	2	-9	1	-9	1	-9	1	-9	1	-9	1	-9	1	-9	1	-9	1	-9	1	-9	1	-9	1
15	1	-9	1	-9	2	-9	1	-9	1	-9	1	-9	1	-9	2	-9	1	-9	2	-9	1	-9	1	-9	1	-9	1	-9	1	-9	1	-9	1	-9	1	-9	1	-9	1	-9	1	-9	1	-9	1	-9	1	-9	1
16	1	-9	1	-9	1	-9	1	-9	1	-9	1	-9	1	-9	2	-9	1	-9	2	-9	1	-9	1	-9	1	-9	2	-9	1	-9	1	-9	1	-9	1	-9	1	-9	1	-9	1	-9	1	-9	1	-9	1	-9	1
17	1	-9	1	-9	2	-9	1	-9	1	-9	1	-9	1	-9	2	-9	1	-9	1	-9	1	-9	1	-9	1	-9	1	-9	1	-9	1	-9	1	-9	1	-9	1	-9	1	-9	1	-9	1	-9	2	-9	1	-9	1
18	1	-9	1	-9	1	-9	1	-9	2	-9	1	-9	1	-9	2	-9	1	-9	1	-9	1	-9	1	-9	1	-9	1	-9	1	-9	1	-9	1	-9	1	-9	1	-9	1	-9	1	-9	1	-9	2	-9	1	-9	1
19	2	-9	1	-9	1	-9	1	-9	1	-9	1	-9	1	-9	2	-9	1	-9	1	-9	1	-9	1	-9	1	-9	2	-9	1	-9	1	-9	1	-9	1	-9	1	-9	1	-9	1	-9	1	-9	1	-9	1	-9	1
20	2	-9	1	-9	1	-9	1	-9	1	-9	1	-9	1	-9	2	-9	1	-9	1	-9	1	-9	1	-9	1	-9	2	-9	1	-9	1	-9	1	-9	1	-9	1	-9	1	-9	1	-9	1	-9	1	-9	1	-9	1
21	2	-9	1	-9	1	-9	1	-9	1	-9	1	-9	1	-9	2	-9	1	-9	1	-9	1	-9	1	-9	1	-9	2	-9	1	-9	1	-9	1	-9	1	-9	1	-9	1	-9	1	-9	1	-9	1	-9	1	-9	1
22	2	-9	1	-9	1	-9	1	-9	1	-9	1	-9	1	-9	2	-9	1	-9	1	-9	1	-9	1	-9	1	-9	2	-9	1	-9	1	-9	1	-9	1	-9	1	-9	1	-9	1	-9	1	-9	1	-9	1	-9	1
23	2	-9	1	-9	1	-9	1	-9	1	-9	1	-9	1	-9	2	-9	1	-9	1	-9	1	-9	1	-9	1	-9	2	-9	1	-9	1	-9	1	-9	1	-9	1	-9	1	-9	1	-9	1	-9	1	-9	1	-9	1
24	2	-9	1	-9	1	-9	1	-9	1	-9	1	-9	1	-9	2	-9	1	-9	1	-9	1	-9	1	-9	1	-9	2	-9	1	-9	1	-9	1	-9	1	-9	1	-9	1	-9	1	-9	1	-9	1	-9	1	-9	1
25	2	-9	1	-9	1	-9	1	-9	1	-9	1	-9	1	-9	2	-9	1	-9	1	-9	1	-9	1	-9	1	-9	2	-9	1	-9	1	-9	1	-9	1	-9	1	-9	1	-9	1	-9	1	-9	1	-9	1	-9	1
26	2	-9	1	-9	1	-9	1	-9	1	-9	1	-9	1	-9	2	-9	1	-9	1	-9	1	-9	1	-9	1	-9	2	-9	1	-9	2	-9	1	-9	1	-9	1	-9	1	-9	1	-9	1	-9	1	-9	1	-9	1
27	2	-9	1	-9	1	-9	1	-9	1	-9	1	-9	1	-9	2	-9	1	-9	1	-9	1	-9	1	-9	1	-9	2	-9	1	-9	1	-9	1	-9	1	-9	1	-9	1	-9	1	-9	1	-9	1	-9	1	-9	1
28	2	-9	1	-9	1	-9	1	-9	1	-9	1	-9	1	-9	2	-9	1	-9	1	-9	1	-9	1	-9	1	-9	2	-9	1	-9	1	-9	1	-9	1	-9	1	-9	1	-9	1	-9	1	-9	1	-9	1	-9	1
29	2	-9	1	-9	1	-9	1	-9	1	-9	1	-9	1	-9	2	-9	1	-9	1	-9	1	-9	1	-9	1	-9	2	-9	1	-9	1	-9	1	-9	1	-9	1	-9	1	-9	1	-9	1	-9	1	-9	1	-9	1
30	2	-9	1	-9	1	-9	1	-9	1	-9	1	-9	1	-9	2	-9	1	-9	1	-9	2	-9	1	-9	1	-9	2	-9	1	-9	1	-9	1	-9	1	-9	1	-9	1	-9	1	-9	1	-9	1	-9	1	-9	1
31	2	-9	1	-9	1	-9	1	-9	1	-9	1	-9	1	-9	2	-9	1	-9	1	-9	1	-9	1	-9	1	-9	2	-9	1	-9	1	-9	1	-9	1	-9	1	-9	1	-9	1	-9	1	-9	1	-9	1	-9	1
32	2	-9	1	-9	1	-9	1	-9	1	-9	1	-9	1	-9	2	-9	1	-9	1	-9	1	-9	1	-9	1	-9	2	-9	1	-9	1	-9	1	-9	1	-9	1	-9	1	-9	1	-9	1	-9	1	-9	1	-9	1
33	2	-9	1	-9	1	-9	1	-9	1	-9	1	-9	1	-9	2	-9	1	-9	2	-9	2	-9	1	-9	1	-9	2	-9	1	-9	1	-9	1	-9	1	-9	1	-9	1	-9	1	-9	1	-9	1	-9	1	-9	1
34	2	-9	1	-9	1	-9	1	-9	1	-9	1	-9	1	-9	2	-9	1	-9	1	-9	1	-9	1	-9	1	-9	1	-9	1	-9	1	-9	1	-9	1	-9	1	-9	1	-9	1	-9	1	-9	1	-9	1	-9	1
35	2	-9	1	-9	1	-9	1	-9	1	-9	1	-9	1	-9	2	-9	1	-9	1	-9	1	-9	1	-9	1	-9	2	-9	1	-9	1	-9	1	-9	1	-9	1	-9	1	-9	1	-9	1	-9	1	-9	1	-9	1
36	2	-9	1	-9	1	-9	1	-9	1	-9	1	-9	1	-9	2	-9	1	-9	1	-9	2	-9	1	-9	1	-9	2	-9	1	-9	1	-9	1	-9	1	-9	1	-9	1	-9	1	-9	1	-9	1	-9	1	-9	1
37	2	-9	1	-9	1	-9	1	-9	1	-9	1	-9	1	-9	2	-9	1	-9	1	-9	1	-9	1	-9	1	-9	2	-9	1	-9	1	-9	1	-9	1	-9	1	-9	1	-9	1	-9	1	-9	1	-9	1	-9	1
38	2	-9	1	-9	1	-9	1	-9	1	-9	1	-9	1	-9	2	-9	1	-9	1	-9	1	-9	1	-9	1	-9	2	-9	1	-9	1	-9	1	-9	1	-9	1	-9	1	-9	1	-9	1	-9	1	-9	1	-9	1
[truncated: 176 more columns]

## Sheet: 5%
Blue29	Red51	Blue55	Yellow67	Red66	Blue60	Red27	Blue33	Blue78	Yellow48	Blue80	Red9	Red28	Blue19	Red35	Blue30	Blue96	Blue23	Red61	Blue102	Blue44	Blue47	Blue31	Yellow45	Red45	Blue94	Blue83	Red68	Red6	Blue99	Red4	Red25	Red55	Red40	Blue100	Red8	Blue53	Red13	Blue84	Yellow70	Yellow36	Red3	Red10	Blue10	Red32	Blue8	Yellow72	Red1	Blue51	Blue45
-9	-9	-9	-9	-9	-9	-9	-9	-9	-9	-9	-9	-9	-9	-9	-9	-9	-9	-9	-9	-9	-9	-9	-9	-9	-9	-9	-9	-9	-9	-9	-9	-9	-9	-9	-9	-9	-9	-9	-9	-9	-9	-9	-9	-9	-9	-9	-9	-9	-9
1	1	-9	1	-9	1	-9	1	-9	1	-9	1	-9	1	-9	2	-9	1	-9	1	-9	1	-9	1	-9	1	-9	2	-9	1	-9	1	-9	1	-9	1	-9	1	-9	1	-9	1	-9	1	-9	1	-9	1	-9	1
2	1	-9	1	-9	2	-9	2	-9	1	-9	1	-9	1	-9	2	-9	1	-9	1	-9	1	-9	1	-9	1	-9	2	-9	1	-9	1	-9	1	-9	1	-9	1	-9	1	-9	1	-9	1	-9	1	-9	1	-9	1
3	1	-9	1	-9	1	-9	1	-9	1	-9	1	-9	1	-9	2	-9	1	-9	1	-9	1	-9	1	-9	1	-9	2	-9	1	-9	1	-9	1	-9	1	-9	1	-9	1	-9	1	-9	1	-9	1	-9	1	-9	1
4	1	-9	1	-9	2	-9	1	-9	1	-9	1	-9	1	-9	2	-9	1	-9	1	-9	1	-9	1	-9	1	-9	2	-9	1	-9	1	-9	1	-9	1	-9	1	-9	1	-9	1	-9	1	-9	1	-9	1	-9	1
5	1	-9	1	-9	2	-9	1	-9	1	-9	1	-9	1	-9	2	-9	1	-9	1	-9	1	-9	1	-9	1	-9	1	-9	1	-9	1	-9	1	-9	1	-9	1	-9	1	-9	1	-9	1	-9	1	-9	1	-9	1
6	1	-9	1	-9	2	-9	1	-9	1	-9	1	-9	1	-9	2	-9	1	-9	1	-9	1	-9	1	-9	1	-9	2	-9	1	-9	1	-9	1	-9	1	-9	1	-9	1	-9	1	-9	1	-9	1	-9	1	-9	1
7	1	-9	1	-9	2	-9	1	-9	1	-9	1	-9	1	-9	2	-9	1	-9	1	-9	1	-9	1	-9	1	-9	2	-9	1	-9	1	-9	1	-9	1	-9	1	-9	1	-9	2	-9	1	-9	1	-9	1	-9	1
8	1	-9	1	-9	2	-9	1	-9	1	-9	1	-9	1	-9	2	-9	1	-9	1	-9	1	-9	1	-9	1	-9	2	-9	1	-9	1	-9	1	-9	1	-9	1	-9	1	-9	1	-9	1	-9	1	-9	1	-9	1
9	1	-9	1	-9	2	-9	1	-9	1	-9	1	-9	1	-9	2	-9	1	-9	1	-9	1	-9	1	-9	1	-9	1	-9	1	-9	1	-9	1	-9	1	-9	1	-9	1	-9	1	-9	1	-9	1	-9	1	-9	1
10	1	-9	1	-9	2	-9	2	-9	1	-9	1	-9	1	-9	2	-9	1	-9	1	-9	1	-9	1	-9	1	-9	1	-9	1	-9	1	-9	1	-9	1	-9	1	-9	1	-9	1	-9	1	-9	1	-9	1	-9	1
11	1	-9	1	-9	1	-9	1	-9	1	-9	1	-9	1	-9	2	-9	1	-9	1	-9	1	-9	1	-9	1	-9	2	-9	1	-9	1	-9	1	-9	1	-9	1	-9	1	-9	1	-9	1	-9	1	-9	1	-9	1
12	1	-9	1	-9	2	-9	1	-9	1	-9	1	-9	1	-9	2	-9	1	-9	1	-9	1	-9	1	-9	1	-9	2	-9	1	-9	1	-9	1	-9	1	-9	1	-9	1	-9	1	-9	1	-9	1	-9	1	-9	1
13	1	-9	1	-9	2	-9	1	-9	1	-9	1	-9	1	-9	2	-9	1	-9	1	-9	1	-9	1	-9	1	-9	2	-9	1	-9	1	-9	1	-9	1	-9	1	-9	1	-9	1	-9	1	-9	1	-9	1	-9	1
14	1	-9	1	-9	2	-9	2	-9	1	-9	1	-9	1	-9	2	-9	1	-9	1	-9	1	-9	1	-9	1	-9	2	-9	1	-9	1	-9	1	-9	1	-9	1	-9	1	-9	1	-9	1	-9	1	-9	1	-9	1
15	1	-9	1	-9	2	-9	1	-9	1	-9	1	-9	1	-9	2	-9	1	-9	2	-9	1	-9	1	-9	1	-9	1	-9	1	-9	1	-9	1	-9	1	-9	1	-9	1	-9	1	-9	1	-9	1	-9	1	-9	1
16	1	-9	1	-9	1	-9	1	-9	1	-9	1	-9	1	-9	2	-9	1	-9	2	-9	1	-9	1	-9	1	-9	2	-9	1	-9	1	-9	1	-9	1	-9	1	-9	1	-9	1	-9	1	-9	1	-9	1	-9	1
17	1	-9	1	-9	2	-9	1	-9	1	-9	1	-9	1	-9	2	-9	1	-9	1	-9	1	-9	1	-9	1	-9	1	-9	1	-9	1	-9	1	-9	1	-9	1	-9	1	-9	1	-9	1	-9	2	-9	1	-9	1
18	1	-9	1	-9	1	-9	1	-9	2	-9	1	-9	1	-9	2	-9	1	-9	1	-9	1	-9	1	-9	1	-9	1	-9	1	-9	1	-9	1	-9	1	-9	1	-9	1	-9	1	-9	1	-9	2	-9	1	-9	1
19	2	-9	1	-9	1	-9	1	-9	1	-9	1	-9	1	-9	2	-9	1	-9	1	-9	1	-9	1	-9	1	-9	2	-9	1	-9	1	-9	1	-9	1	-9	1	-9	1	-9	1	-9	1	-9	1	-9	1	-9	1
20	2	-9	1	-9	1	-9	1	-9	1	-9	1	-9	1	-9	2	-9	1	-9	1	-9	1	-9	1	-9	1	-9	2	-9	1	-9	1	-9	1	-9	1	-9	1	-9	1	-9	1	-9	1	-9	1	-9	1	-9	1
21	2	-9	1	-9	1	-9	1	-9	1	-9	1	-9	1	-9	2	-9	1	-9	1	-9	1	-9	1	-9	1	-9	2	-9	1	-9	1	-9	1	-9	1	-9	1	-9	1	-9	1	-9	1	-9	1	-9	1	-9	1
22	2	-9	1	-9	1	-9	1	-9	1	-9	1	-9	1	-9	2	-9	1	-9	1	-9	1	-9	1	-9	1	-9	2	-9	1	-9	1	-9	1	-9	1	-9	1	-9	1	-9	1	-9	1	-9	1	-9	1	-9	1
23	2	-9	1	-9	1	-9	1	-9	1	-9	1	-9	1	-9	2	-9	1	-9	1	-9	1	-9	1	-9	1	-9	2	-9	1	-9	1	-9	1	-9	1	-9	1	-9	1	-9	1	-9	1	-9	1	-9	1	-9	1
24	2	-9	1	-9	1	-9	1	-9	1	-9	1	-9	1	-9	2	-9	1	-9	1	-9	1	-9	1	-9	1	-9	2	-9	1	-9	1	-9	1	-9	1	-9	1	-9	1	-9	1	-9	1	-9	1	-9	1	-9	1
25	2	-9	1	-9	1	-9	1	-9	1	-9	1	-9	1	-9	2	-9	1	-9	1	-9	1	-9	1	-9	1	-9	2	-9	1	-9	1	-9	1	-9	1	-9	1	-9	1	-9	1	-9	1	-9	1	-9	1	-9	1
26	2	-9	1	-9	1	-9	1	-9	1	-9	1	-9	1	-9	2	-9	1	-9	1	-9	1	-9	1	-9	1	-9	2	-9	1	-9	2	-9	1	-9	1	-9	1	-9	1	-9	1	-9	1	-9	1	-9	1	-9	1
27	2	-9	1	-9	1	-9	1	-9	1	-9	1	-9	1	-9	2	-9	1	-9	1	-9	1	-9	1	-9	1	-9	2	-9	1	-9	1	-9	1	-9	1	-9	1	-9	1	-9	1	-9	1	-9	1	-9	1	-9	1
28	2	-9	1	-9	1	-9	1	-9	1	-9	1	-9	1	-9	2	-9	1	-9	1	-9	1	-9	1	-9	1	-9	2	-9	1	-9	1	-9	1	-9	1	-9	1	-9	1	-9	1	-9	1	-9	1	-9	1	-9	1
29	2	-9	1	-9	1	-9	1	-9	1	-9	1	-9	1	-9	2	-9	1	-9	1	-9	1	-9	1	-9	1	-9	2	-9	1	-9	1	-9	1	-9	1	-9	1	-9	1	-9	1	-9	1	-9	1	-9	1	-9	1
30	2	-9	1	-9	1	-9	1	-9	1	-9	1	-9	1	-9	2	-9	1	-9	1	-9	2	-9	1	-9	1	-9	2	-9	1	-9	1	-9	1	-9	1	-9	1	-9	1	-9	1	-9	1	-9	1	-9	1	-9	1
31	2	-9	1	-9	1	-9	1	-9	1	-9	1	-9	1	-9	2	-9	1	-9	1	-9	1	-9	1	-9	1	-9	2	-9	1	-9	1	-9	1	-9	1	-9	1	-9	1	-9	1	-9	1	-9	1	-9	1	-9	1
32	2	-9	1	-9	1	-9	1	-9	1	-9	1	-9	1	-9	2	-9	1	-9	1	-9	1	-9	1	-9	1	-9	2	-9	1	-9	1	-9	1	-9	1	-9	1	-9	1	-9	1	-9	1	-9	1	-9	1	-9	1
33	2	-9	1	-9	1	-9	1	-9	1	-9	1	-9	1	-9	2	-9	1	-9	2	-9	2	-9	1	-9	1	-9	2	-9	1	-9	1	-9	1	-9	1	-9	1	-9	1	-9	1	-9	1	-9	1	-9	1	-9	1
34	2	-9	1	-9	1	-9	1	-9	1	-9	1	-9	1	-9	2	-9	1	-9	1	-9	1	-9	1	-9	1	-9	1	-9	1	-9	1	-9	1	-9	1	-9	1	-9	1	-9	1	-9	1	-9	1	-9	1	-9	1
35	2	-9	1	-9	1	-9	1	-9	1	-9	1	-9	1	-9	2	-9	1	-9	1	-9	1	-9	1	-9	1	-9	2	-9	1	-9	1	-9	1	-9	1	-9	1	-9	1	-9	1	-9	1	-9	1	-9	1	-9	1
36	2	-9	1	-9	1	-9	1	-9	1	-9	1	-9	1	-9	2	-9	1	-9	1	-9	2	-9	1	-9	1	-9	2	-9	1	-9	1	-9	1	-9	1	-9	1	-9	1	-9	1	-9	1	-9	1	-9	1	-9	1
37	2	-9	1	-9	1	-9	1	-9	1	-9	1	-9	1	-9	2	-9	1	-9	1	-9	1	-9	1	-9	1	-9	2	-9	1	-9	1	-9	1	-9	1	-9	1	-9	1	-9	1	-9	1	-9	1	-9	1	-9	1
38	2	-9	1	-9	1	-9	1	-9	1	-9	1	-9	1	-9	2	-9	1	-9	1	-9	1	-9	1	-9	1	-9	2	-9	1	-9	1	-9	1	-9	1	-9	1	-9	1	-9	1	-9	1	-9	1	-9	1	-9	1
[truncated: 208 more columns]

## Sheet: 6%
Blue29	Red51	Blue55	Yellow67	Red66	Blue60	Red27	Blue33	Blue78	Yellow48	Blue80	Red9	Red28	Blue19	Red35	Blue30	Blue96	Blue23	Red61	Blue102	Blue44	Blue47	Blue31	Yellow45	Red45	Blue94	Blue83	Red68	Red6	Blue99	Red4	Red25	Red55	Red40	Blue100	Red8	Blue53	Red13	Blue84	Yellow70	Yellow36	Red3	Red10	Blue10	Red32	Blue8	Yellow72	Red1	Blue51	Blue45
-9	-9	-9	-9	-9	-9	-9	-9	-9	-9	-9	-9	-9	-9	-9	-9	-9	-9	-9	-9	-9	-9	-9	-9	-9	-9	-9	-9	-9	-9	-9	-9	-9	-9	-9	-9	-9	-9	-9	-9	-9	-9	-9	-9	-9	-9	-9	-9	-9	-9
1	1	-9	1	-9	1	-9	1	-9	1	-9	1	-9	1	-9	2	-9	1	-9	1	-9	1	-9	1	-9	1	-9	2	-9	1	-9	1	-9	1	-9	1	-9	1	-9	1	-9	1	-9	1	-9	1	-9	1	-9	1
2	1	-9	1	-9	2	-9	2	-9	1	-9	1	-9	1	-9	2	-9	1	-9	1	-9	1	-9	1	-9	1	-9	2	-9	1	-9	1	-9	1	-9	1	-9	1	-9	1	-9	1	-9	1	-9	1	-9	1	-9	1
3	1	-9	1	-9	1	-9	1	-9	1	-9	1	-9	1	-9	2	-9	1	-9	1	-9	1	-9	1	-9	1	-9	2	-9	1	-9	1	-9	1	-9	1	-9	1	-9	1	-9	1	-9	1	-9	1	-9	1	-9	1
4	1	-9	1	-9	2	-9	1	-9	1	-9	1	-9	1	-9	2	-9	1	-9	1	-9	1	-9	1	-9	1	-9	2	-9	1	-9	1	-9	1	-9	1	-9	1	-9	1	-9	1	-9	1	-9	1	-9	1	-9	1
5	1	-9	1	-9	2	-9	1	-9	1	-9	1	-9	1	-9	2	-9	1	-9	1	-9	1	-9	1	-9	1	-9	1	-9	1	-9	1	-9	1	-9	1	-9	1	-9	1	-9	1	-9	1	-9	1	-9	1	-9	1
6	1	-9	1	-9	2	-9	1	-9	1	-9	1	-9	1	-9	2	-9	1	-9	1	-9	1	-9	1	-9	1	-9	2	-9	1	-9	1	-9	1	-9	1	-9	1	-9	1	-9	1	-9	1	-9	1	-9	1	-9	1
7	1	-9	1	-9	2	-9	1	-9	1	-9	1	-9	1	-9	2	-9	1	-9	1	-9	1	-9	1	-9	1	-9	2	-9	1	-9	1	-9	1	-9	1	-9	1	-9	1	-9	2	-9	1	-9	1	-9	1	-9	1
8	1	-9	1	-9	2	-9	1	-9	1	-9	1	-9	1	-9	2	-9	1	-9	1	-9	1	-9	1	-9	1	-9	2	-9	1	-9	1	-9	1	-9	1	-9	1	-9	1	-9	1	-9	1	-9	1	-9	1	-9	1
9	1	-9	1	-9	2	-9	1	-9	1	-9	1	-9	1	-9	2	-9	1	-9	1	-9	1	-9	1	-9	1	-9	1	-9	1	-9	1	-9	1	-9	1	-9	1	-9	1	-9	1	-9	1	-9	1	-9	1	-9	1
10	1	-9	1	-9	2	-9	2	-9	1	-9	1	-9	1	-9	2	-9	1	-9	1	-9	1	-9	1	-9	1	-9	1	-9	1	-9	1	-9	1	-9	1	-9	1	-9	1	-9	1	-9	1	-9	1	-9	1	-9	1
11	1	-9	1	-9	1	-9	1	-9	1	-9	1	-9	1	-9	2	-9	1	-9	1	-9	1	-9	1	-9	1	-9	2	-9	1	-9	1	-9	1	-9	1	-9	1	-9	1	-9	1	-9	1	-9	1	-9	1	-9	1
12	1	-9	1	-9	2	-9	1	-9	1	-9	1	-9	1	-9	2	-9	1	-9	1	-9	1	-9	1	-9	1	-9	2	-9	1	-9	1	-9	1	-9	1	-9	1	-9	1	-9	1	-9	1	-9	1	-9	1	-9	1
13	1	-9	1	-9	2	-9	1	-9	1	-9	1	-9	1	-9	2	-9	1	-9	1	-9	1	-9	1	-9	1	-9	2	-9	1	-9	1	-9	1	-9	1	-9	1	-9	1	-9	1	-9	1	-9	1	-9	1	-9	1
14	1	-9	1	-9	2	-9	2	-9	1	-9	1	-9	1	-9	2	-9	1	-9	1	-9	1	-9	1	-9	1	-9	2	-9	1	-9	1	-9	1	-9	1	-9	1	-9	1	-9	1	-9	1	-9	1	-9	1	-9	1
15	1	-9	1	-9	2	-9	1	-9	1	-9	1	-9	1	-9	2	-9	1	-9	2	-9	1	-9	1	-9	1	-9	1	-9	1	-9	1	-9	1	-9	1	-9	1	-9	1	-9	1	-9	1	-9	1	-9	1	-9	1
16	1	-9	1	-9	1	-9	1	-9	1	-9	1	-9	1	-9	2	-9	1	-9	2	-9	1	-9	1	-9	1	-9	2	-9	1	-9	1	-9	1	-9	1	-9	1	-9	1	-9	1	-9	1	-9	1	-9	1	-9	1
17	1	-9	1	-9	2	-9	1	-9	1	-9	1	-9	1	-9	2	-9	1	-9	1	-9	1	-9	1	-9	1	-9	1	-9	1	-9	1	-9	1	-9	1	-9	1	-9	1	-9	1	-9	1	-9	2	-9	1	-9	1
18	1	-9	1	-9	1	-9	1	-9	2	-9	1	-9	1	-9	2	-9	1	-9	1	-9	1	-9	1	-9	1	-9	1	-9	1	-9	1	-9	1	-9	1	-9	1	-9	1	-9	1	-9	1	-9	2	-9	1	-9	1
19	2	-9	1	-9	1	-9	1	-9	1	-9	1	-9	1	-9	2	-9	1	-9	1	-9	1	-9	1	-9	1	-9	2	-9	1	-9	1	-9	1	-9	1	-9	1	-9	1	-9	1	-9	1	-9	1	-9	1	-9	1
20	2	-9	1	-9	1	-9	1	-9	1	-9	1	-9	1	-9	2	-9	1	-9	1	-9	1	-9	1	-9	1	-9	2	-9	1	-9	1	-9	1	-9	1	-9	1	-9	1	-9	1	-9	1	-9	1	-9	1	-9	1
21	2	-9	1	-9	1	-9	1	-9	1	-9	1	-9	1	-9	2	-9	1	-9	1	-9	1	-9	1	-9	1	-9	2	-9	1	-9	1	-9	1	-9	1	-9	1	-9	1	-9	1	-9	1	-9	1	-9	1	-9	1
22	2	-9	1	-9	1	-9	1	-9	1	-9	1	-9	1	-9	2	-9	1	-9	1	-9	1	-9	1	-9	1	-9	2	-9	1	-9	1	-9	1	-9	1	-9	1	-9	1	-9	1	-9	1	-9	1	-9	1	-9	1
23	2	-9	1	-9	1	-9	1	-9	1	-9	1	-9	1	-9	2	-9	1	-9	1	-9	1	-9	1	-9	1	-9	2	-9	1	-9	1	-9	1	-9	1	-9	1	-9	1	-9	1	-9	1	-9	1	-9	1	-9	1
24	2	-9	1	-9	1	-9	1	-9	1	-9	1	-9	1	-9	2	-9	1	-9	1	-9	1	-9	1	-9	1	-9	2	-9	1	-9	1	-9	1	-9	1	-9	1	-9	1	-9	1	-9	1	-9	1	-9	1	-9	1
25	2	-9	1	-9	1	-9	1	-9	1	-9	1	-9	1	-9	2	-9	1	-9	1	-9	1	-9	1	-9	1	-9	2	-9	1	-9	1	-9	1	-9	1	-9	1	-9	1	-9	1	-9	1	-9	1	-9	1	-9	1
26	2	-9	1	-9	1	-9	1	-9	1	-9	1	-9	1	-9	2	-9	1	-9	1	-9	1	-9	1	-9	1	-9	2	-9	1	-9	2	-9	1	-9	1	-9	1	-9	1	-9	1	-9	1	-9	1	-9	1	-9	1
27	2	-9	1	-9	1	-9	1	-9	1	-9	1	-9	1	-9	2	-9	1	-9	1	-9	1	-9	1	-9	1	-9	2	-9	1	-9	1	-9	1	-9	1	-9	1	-9	1	-9	1	-9	1	-9	1	-9	1	-9	1
28	2	-9	1	-9	1	-9	1	-9	1	-9	1	-9	1	-9	2	-9	1	-9	1	-9	1	-9	1	-9	1	-9	2	-9	1	-9	1	-9	1	-9	1	-9	1	-9	1	-9	1	-9	1	-9	1	-9	1	-9	1
29	2	-9	1	-9	1	-9	1	-9	1	-9	1	-9	1	-9	2	-9	1	-9	1	-9	1	-9	1	-9	1	-9	2	-9	1	-9	1	-9	1	-9	1	-9	1	-9	1	-9	1	-9	1	-9	1	-9	1	-9	1
30	2	-9	1	-9	1	-9	1	-9	1	-9	1	-9	1	-9	2	-9	1	-9	1	-9	2	-9	1	-9	1	-9	2	-9	1	-9	1	-9	1	-9	1	-9	1	-9	1	-9	1	-9	1	-9	1	-9	1	-9	1
31	2	-9	1	-9	1	-9	1	-9	1	-9	1	-9	1	-9	2	-9	1	-9	1	-9	1	-9	1	-9	1	-9	2	-9	1	-9	1	-9	1	-9	1	-9	1	-9	1	-9	1	-9	1	-9	1	-9	1	-9	1
32	2	-9	1	-9	1	-9	1	-9	1	-9	1	-9	1	-9	2	-9	1	-9	1	-9	1	-9	1	-9	1	-9	2	-9	1	-9	1	-9	1	-9	1	-9	1	-9	1	-9	1	-9	1	-9	1	-9	1	-9	1
33	2	-9	1	-9	1	-9	1	-9	1	-9	1	-9	1	-9	2	-9	1	-9	2	-9	2	-9	1	-9	1	-9	2	-9	1	-9	1	-9	1	-9	1	-9	1	-9	1	-9	1	-9	1	-9	1	-9	1	-9	1
34	2	-9	1	-9	1	-9	1	-9	1	-9	1	-9	1	-9	2	-9	1	-9	1	-9	1	-9	1	-9	1	-9	1	-9	1	-9	1	-9	1	-9	1	-9	1	-9	1	-9	1	-9	1	-9	1	-9	1	-9	1
35	2	-9	1	-9	1	-9	1	-9	1	-9	1	-9	1	-9	2	-9	1	-9	1	-9	1	-9	1	-9	1	-9	2	-9	1	-9	1	-9	1	-9	1	-9	1	-9	1	-9	1	-9	1	-9	1	-9	1	-9	1
36	2	-9	1	-9	1	-9	1	-9	1	-9	1	-9	1	-9	2	-9	1	-9	1	-9	2	-9	1	-9	1	-9	2	-9	1	-9	1	-9	1	-9	1	-9	1	-9	1	-9	1	-9	1	-9	1	-9	1	-9	1
37	2	-9	1	-9	1	-9	1	-9	1	-9	1	-9	1	-9	2	-9	1	-9	1	-9	1	-9	1	-9	1	-9	2	-9	1	-9	1	-9	1	-9	1	-9	1	-9	1	-9	1	-9	1	-9	1	-9	1	-9	1
38	2	-9	1	-9	1	-9	1	-9	1	-9	1	-9	1	-9	2	-9	1	-9	1	-9	1	-9	1	-9	1	-9	2	-9	1	-9	1	-9	1	-9	1	-9	1	-9	1	-9	1	-9	1	-9	1	-9	1	-9	1
[truncated: 236 more columns]

## Sheet: 7%
Blue29	Red51	Blue55	Yellow67	Red66	Blue60	Red27	Blue33	Blue78	Yellow48	Blue80	Red9	Red28	Blue19	Red35	Blue30	Blue96	Blue23	Red61	Blue102	Blue44	Blue47	Blue31	Yellow45	Red45	Blue94	Blue83	Red68	Red6	Blue99	Red4	Red25	Red55	Red40	Blue100	Red8	Blue53	Red13	Blue84	Yellow70	Yellow36	Red3	Red10	Blue10	Red32	Blue8	Yellow72	Red1	Blue51	Blue45
-9	-9	-9	-9	-9	-9	-9	-9	-9	-9	-9	-9	-9	-9	-9	-9	-9	-9	-9	-9	-9	-9	-9	-9	-9	-9	-9	-9	-9	-9	-9	-9	-9	-9	-9	-9	-9	-9	-9	-9	-9	-9	-9	-9	-9	-9	-9	-9	-9	-9
1	1	-9	1	-9	1	-9	1	-9	1	-9	1	-9	1	-9	2	-9	1	-9	1	-9	1	-9	1	-9	1	-9	2	-9	1	-9	1	-9	1	-9	1	-9	1	-9	1	-9	1	-9	1	-9	1	-9	1	-9	1
2	1	-9	1	-9	2	-9	2	-9	1	-9	1	-9	1	-9	2	-9	1	-9	1	-9	1	-9	1	-9	1	-9	2	-9	1	-9	1	-9	1	-9	1	-9	1	-9	1	-9	1	-9	1	-9	1	-9	1	-9	1
3	1	-9	1	-9	1	-9	1	-9	1	-9	1	-9	1	-9	2	-9	1	-9	1	-9	1	-9	1	-9	1	-9	2	-9	1	-9	1	-9	1	-9	1	-9	1	-9	1	-9	1	-9	1	-9	1	-9	1	-9	1
4	1	-9	1	-9	2	-9	1	-9	1	-9	1	-9	1	-9	2	-9	1	-9	1	-9	1	-9	1	-9	1	-9	2	-9	1	-9	1	-9	1	-9	1	-9	1	-9	1	-9	1	-9	1	-9	1	-9	1	-9	1
5	1	-9	1	-9	2	-9	1	-9	1	-9	1	-9	1	-9	2	-9	1	-9	1	-9	1	-9	1	-9	1	-9	1	-9	1	-9	1	-9	1	-9	1	-9	1	-9	1	-9	1	-9	1	-9	1	-9	1	-9	1
6	1	-9	1	-9	2	-9	1	-9	1	-9	1	-9	1	-9	2	-9	1	-9	1	-9	1	-9	1	-9	1	-9	2	-9	1	-9	1	-9	1	-9	1	-9	1	-9	1	-9	1	-9	1	-9	1	-9	1	-9	1
7	1	-9	1	-9	2	-9	1	-9	1	-9	1	-9	1	-9	2	-9	1	-9	1	-9	1	-9	1	-9	1	-9	2	-9	1	-9	1	-9	1	-9	1	-9	1	-9	1	-9	2	-9	1	-9	1	-9	1	-9	1
8	1	-9	1	-9	2	-9	1	-9	1	-9	1	-9	1	-9	2	-9	1	-9	1	-9	1	-9	1	-9	1	-9	2	-9	1	-9	1	-9	1	-9	1	-9	1	-9	1	-9	1	-9	1	-9	1	-9	1	-9	1
9	1	-9	1	-9	2	-9	1	-9	1	-9	1	-9	1	-9	2	-9	1	-9	1	-9	1	-9	1	-9	1	-9	1	-9	1	-9	1	-9	1	-9	1	-9	1	-9	1	-9	1	-9	1	-9	1	-9	1	-9	1
10	1	-9	1	-9	2	-9	2	-9	1	-9	1	-9	1	-9	2	-9	1	-9	1	-9	1	-9	1	-9	1	-9	1	-9	1	-9	1	-9	1	-9	1	-9	1	-9	1	-9	1	-9	1	-9	1	-9	1	-9	1
11	1	-9	1	-9	1	-9	1	-9	1	-9	1	-9	1	-9	2	-9	1	-9	1	-9	1	-9	1	-9	1	-9	2	-9	1	-9	1	-9	1	-9	1	-9	1	-9	1	-9	1	-9	1	-9	1	-9	1	-9	1
12	1	-9	1	-9	2	-9	1	-9	1	-9	1	-9	1	-9	2	-9	1	-9	1	-9	1	-9	1	-9	1	-9	2	-9	1	-9	1	-9	1	-9	1	-9	1	-9	1	-9	1	-9	1	-9	1	-9	1	-9	1
13	1	-9	1	-9	2	-9	1	-9	1	-9	1	-9	1	-9	2	-9	1	-9	1	-9	1	-9	1	-9	1	-9	2	-9	1	-9	1	-9	1	-9	1	-9	1	-9	1	-9	1	-9	1	-9	1	-9	1	-9	1
14	1	-9	1	-9	2	-9	2	-9	1	-9	1	-9	1	-9	2	-9	1	-9	1	-9	1	-9	1	-9	1	-9	2	-9	1	-9	1	-9	1	-9	1	-9	1	-9	1	-9	1	-9	1	-9	1	-9	1	-9	1
15	1	-9	1	-9	2	-9	1	-9	1	-9	1	-9	1	-9	2	-9	1	-9	2	-9	1	-9	1	-9	1	-9	1	-9	1	-9	1	-9	1	-9	1	-9	1	-9	1	-9	1	-9	1	-9	1	-9	1	-9	1
16	1	-9	1	-9	1	-9	1	-9	1	-9	1	-9	1	-9	2	-9	1	-9	2	-9	1	-9	1	-9	1	-9	2	-9	1	-9	1	-9	1	-9	1	-9	1	-9	1	-9	1	-9	1	-9	1	-9	1	-9	1
17	1	-9	1	-9	2	-9	1	-9	1	-9	1	-9	1	-9	2	-9	1	-9	1	-9	1	-9	1	-9	1	-9	1	-9	1	-9	1	-9	1	-9	1	-9	1	-9	1	-9	1	-9	1	-9	2	-9	1	-9	1
18	1	-9	1	-9	1	-9	1	-9	2	-9	1	-9	1	-9	2	-9	1	-9	1	-9	1	-9	1	-9	1	-9	1	-9	1	-9	1	-9	1	-9	1	-9	1	-9	1	-9	1	-9	1	-9	2	-9	1	-9	1
19	2	-9	1	-9	1	-9	1	-9	1	-9	1	-9	1	-9	2	-9	1	-9	1	-9	1	-9	1	-9	1	-9	2	-9	1	-9	1	-9	1	-9	1	-9	1	-9	1	-9	1	-9	1	-9	1	-9	1	-9	1
20	2	-9	1	-9	1	-9	1	-9	1	-9	1	-9	1	-9	2	-9	1	-9	1	-9	1	-9	1	-9	1	-9	2	-9	1	-9	1	-9	1	-9	1	-9	1	-9	1	-9	1	-9	1	-9	1	-9	1	-9	1
21	2	-9	1	-9	1	-9	1	-9	1	-9	1	-9	1	-9	2	-9	1	-9	1	-9	1	-9	1	-9	1	-9	2	-9	1	-9	1	-9	1	-9	1	-9	1	-9	1	-9	1	-9	1	-9	1	-9	1	-9	1
22	2	-9	1	-9	1	-9	1	-9	1	-9	1	-9	1	-9	2	-9	1	-9	1	-9	1	-9	1	-9	1	-9	2	-9	1	-9	1	-9	1	-9	1	-9	1	-9	1	-9	1	-9	1	-9	1	-9	1	-9	1
23	2	-9	1	-9	1	-9	1	-9	1	-9	1	-9	1	-9	2	-9	1	-9	1	-9	1	-9	1	-9	1	-9	2	-9	1	-9	1	-9	1	-9	1	-9	1	-9	1	-9	1	-9	1	-9	1	-9	1	-9	1
24	2	-9	1	-9	1	-9	1	-9	1	-9	1	-9	1	-9	2	-9	1	-9	1	-9	1	-9	1	-9	1	-9	2	-9	1	-9	1	-9	1	-9	1	-9	1	-9	1	-9	1	-9	1	-9	1	-9	1	-9	1
25	2	-9	1	-9	1	-9	1	-9	1	-9	1	-9	1	-9	2	-9	1	-9	1	-9	1	-9	1	-9	1	-9	2	-9	1	-9	1	-9	1	-9	1	-9	1	-9	1	-9	1	-9	1	-9	1	-9	1	-9	1
26	2	-9	1	-9	1	-9	1	-9	1	-9	1	-9	1	-9	2	-9	1	-9	1	-9	1	-9	1	-9	1	-9	2	-9	1	-9	2	-9	1	-9	1	-9	1	-9	1	-9	1	-9	1	-9	1	-9	1	-9	1
27	2	-9	1	-9	1	-9	1	-9	1	-9	1	-9	1	-9	2	-9	1	-9	1	-9	1	-9	1	-9	1	-9	2	-9	1	-9	1	-9	1	-9	1	-9	1	-9	1	-9	1	-9	1	-9	1	-9	1	-9	1
28	2	-9	1	-9	1	-9	1	-9	1	-9	1	-9	1	-9	2	-9	1	-9	1	-9	1	-9	1	-9	1	-9	2	-9	1	-9	1	-9	1	-9	1	-9	1	-9	1	-9	1	-9	1	-9	1	-9	1	-9	1
29	2	-9	1	-9	1	-9	1	-9	1	-9	1	-9	1	-9	2	-9	1	-9	1	-9	1	-9	1	-9	1	-9	2	-9	1	-9	1	-9	1	-9	1	-9	1	-9	1	-9	1	-9	1	-9	1	-9	1	-9	1
30	2	-9	1	-9	1	-9	1	-9	1	-9	1	-9	1	-9	2	-9	1	-9	1	-9	2	-9	1	-9	1	-9	2	-9	1	-9	1	-9	1	-9	1	-9	1	-9	1	-9	1	-9	1	-9	1	-9	1	-9	1
31	2	-9	1	-9	1	-9	1	-9	1	-9	1	-9	1	-9	2	-9	1	-9	1	-9	1	-9	1	-9	1	-9	2	-9	1	-9	1	-9	1	-9	1	-9	1	-9	1	-9	1	-9	1	-9	1	-9	1	-9	1
32	2	-9	1	-9	1	-9	1	-9	1	-9	1	-9	1	-9	2	-9	1	-9	1	-9	1	-9	1	-9	1	-9	2	-9	1	-9	1	-9	1	-9	1	-9	1	-9	1	-9	1	-9	1	-9	1	-9	1	-9	1
33	2	-9	1	-9	1	-9	1	-9	1	-9	1	-9	1	-9	2	-9	1	-9	2	-9	2	-9	1	-9	1	-9	2	-9	1	-9	1	-9	1	-9	1	-9	1	-9	1	-9	1	-9	1	-9	1	-9	1	-9	1
34	2	-9	1	-9	1	-9	1	-9	1	-9	1	-9	1	-9	2	-9	1	-9	1	-9	1	-9	1	-9	1	-9	1	-9	1	-9	1	-9	1	-9	1	-9	1	-9	1	-9	1	-9	1	-9	1	-9	1	-9	1
35	2	-9	1	-9	1	-9	1	-9	1	-9	1	-9	1	-9	2	-9	1	-9	1	-9	1	-9	1	-9	1	-9	2	-9	1	-9	1	-9	1	-9	1	-9	1	-9	1	-9	1	-9	1	-9	1	-9	1	-9	1
36	2	-9	1	-9	1	-9	1	-9	1	-9	1	-9	1	-9	2	-9	1	-9	1	-9	2	-9	1	-9	1	-9	2	-9	1	-9	1	-9	1	-9	1	-9	1	-9	1	-9	1	-9	1	-9	1	-9	1	-9	1
37	2	-9	1	-9	1	-9	1	-9	1	-9	1	-9	1	-9	2	-9	1	-9	1	-9	1	-9	1	-9	1	-9	2	-9	1	-9	1	-9	1	-9	1	-9	1	-9	1	-9	1	-9	1	-9	1	-9	1	-9	1
38	2	-9	1	-9	1	-9	1	-9	1	-9	1	-9	1	-9	2	-9	1	-9	1	-9	1	-9	1	-9	1	-9	2	-9	1	-9	1	-9	1	-9	1	-9	1	-9	1	-9	1	-9	1	-9	1	-9	1	-9	1
[truncated: 260 more columns]

## Sheet: 8%
Blue29	Red51	Blue55	Yellow67	Red66	Blue60	Red27	Blue33	Blue78	Yellow48	Blue80	Red9	Red28	Blue19	Red35	Blue30	Blue96	Blue23	Red61	Blue102	Blue44	Blue47	Blue31	Yellow45	Red45	Blue94	Blue83	Red68	Red6	Blue99	Red4	Red25	Red55	Red40	Blue100	Red8	Blue53	Red13	Blue84	Yellow70	Yellow36	Red3	Red10	Blue10	Red32	Blue8	Yellow72	Red1	Blue51	Blue45
-9	-9	-9	-9	-9	-9	-9	-9	-9	-9	-9	-9	-9	-9	-9	-9	-9	-9	-9	-9	-9	-9	-9	-9	-9	-9	-9	-9	-9	-9	-9	-9	-9	-9	-9	-9	-9	-9	-9	-9	-9	-9	-9	-9	-9	-9	-9	-9	-9	-9
1	1	-9	1	-9	1	-9	1	-9	1	-9	1	-9	1	-9	2	-9	1	-9	1	-9	1	-9	1	-9	1	-9	2	-9	1	-9	1	-9	1	-9	1	-9	1	-9	1	-9	1	-9	1	-9	1	-9	1	-9	1
2	1	-9	1	-9	2	-9	2	-9	1	-9	1	-9	1	-9	2	-9	1	-9	1	-9	1	-9	1	-9	1	-9	2	-9	1	-9	1	-9	1	-9	1	-9	1	-9	1	-9	1	-9	1	-9	1	-9	1	-9	1
3	1	-9	1	-9	1	-9	1	-9	1	-9	1	-9	1	-9	2	-9	1	-9	1	-9	1	-9	1	-9	1	-9	2	-9	1	-9	1	-9	1	-9	1	-9	1	-9	1	-9	1	-9	1	-9	1	-9	1	-9	1
4	1	-9	1	-9	2	-9	1	-9	1	-9	1	-9	1	-9	2	-9	1	-9	1	-9	1	-9	1	-9	1	-9	2	-9	1	-9	1	-9	1	-9	1	-9	1	-9	1	-9	1	-9	1	-9	1	-9	1	-9	1
5	1	-9	1	-9	2	-9	1	-9	1	-9	1	-9	1	-9	2	-9	1	-9	1	-9	1	-9	1	-9	1	-9	1	-9	1	-9	1	-9	1	-9	1	-9	1	-9	1	-9	1	-9	1	-9	1	-9	1	-9	1
6	1	-9	1	-9	2	-9	1	-9	1	-9	1	-9	1	-9	2	-9	1	-9	1	-9	1	-9	1	-9	1	-9	2	-9	1	-9	1	-9	1	-9	1	-9	1	-9	1	-9	1	-9	1	-9	1	-9	1	-9	1
7	1	-9	1	-9	2	-9	1	-9	1	-9	1	-9	1	-9	2	-9	1	-9	1	-9	1	-9	1	-9	1	-9	2	-9	1	-9	1	-9	1	-9	1	-9	1	-9	1	-9	2	-9	1	-9	1	-9	1	-9	1
8	1	-9	1	-9	2	-9	1	-9	1	-9	1	-9	1	-9	2	-9	1	-9	1	-9	1	-9	1	-9	1	-9	2	-9	1	-9	1	-9	1	-9	1	-9	1	-9	1	-9	1	-9	1	-9	1	-9	1	-9	1
9	1	-9	1	-9	2	-9	1	-9	1	-9	1	-9	1	-9	2	-9	1	-9	1	-9	1	-9	1	-9	1	-9	1	-9	1	-9	1	-9	1	-9	1	-9	1	-9	1	-9	1	-9	1	-9	1	-9	1	-9	1
10	1	-9	1	-9	2	-9	2	-9	1	-9	1	-9	1	-9	2	-9	1	-9	1	-9	1	-9	1	-9	1	-9	1	-9	1	-9	1	-9	1	-9	1	-9	1	-9	1	-9	1	-9	1	-9	1	-9	1	-9	1
11	1	-9	1	-9	1	-9	1	-9	1	-9	1	-9	1	-9	2	-9	1	-9	1	-9	1	-9	1	-9	1	-9	2	-9	1	-9	1	-9	1	-9	1	-9	1	-9	1	-9	1	-9	1	-9	1	-9	1	-9	1
12	1	-9	1	-9	2	-9	1	-9	1	-9	1	-9	1	-9	2	-9	1	-9	1	-9	1	-9	1	-9	1	-9	2	-9	1	-9	1	-9	1	-9	1	-9	1	-9	1	-9	1	-9	1	-9	1	-9	1	-9	1
13	1	-9	1	-9	2	-9	1	-9	1	-9	1	-9	1	-9	2	-9	1	-9	1	-9	1	-9	1	-9	1	-9	2	-9	1	-9	1	-9	1	-9	1	-9	1	-9	1	-9	1	-9	1	-9	1	-9	1	-9	1
14	1	-9	1	-9	2	-9	2	-9	1	-9	1	-9	1	-9	2	-9	1	-9	1	-9	1	-9	1	-9	1	-9	2	-9	1	-9	1	-9	1	-9	1	-9	1	-9	1	-9	1	-9	1	-9	1	-9	1	-9	1
15	1	-9	1	-9	2	-9	1	-9	1	-9	1	-9	1	-9	2	-9	1	-9	2	-9	1	-9	1	-9	1	-9	1	-9	1	-9	1	-9	1	-9	1	-9	1	-9	1	-9	1	-9	1	-9	1	-9	1	-9	1
16	1	-9	1	-9	1	-9	1	-9	1	-9	1	-9	1	-9	2	-9	1	-9	2	-9	1	-9	1	-9	1	-9	2	-9	1	-9	1	-9	1	-9	1	-9	1	-9	1	-9	1	-9	1	-9	1	-9	1	-9	1
17	1	-9	1	-9	2	-9	1	-9	1	-9	1	-9	1	-9	2	-9	1	-9	1	-9	1	-9	1	-9	1	-9	1	-9	1	-9	1	-9	1	-9	1	-9	1	-9	1	-9	1	-9	1	-9	2	-9	1	-9	1
18	1	-9	1	-9	1	-9	1	-9	2	-9	1	-9	1	-9	2	-9	1	-9	1	-9	1	-9	1	-9	1	-9	1	-9	1	-9	1	-9	1	-9	1	-9	1	-9	1	-9	1	-9	1	-9	2	-9	1	-9	1
19	2	-9	1	-9	1	-9	1	-9	1	-9	1	-9	1	-9	2	-9	1	-9	1	-9	1	-9	1	-9	1	-9	2	-9	1	-9	1	-9	1	-9	1	-9	1	-9	1	-9	1	-9	1	-9	1	-9	1	-9	1
20	2	-9	1	-9	1	-9	1	-9	1	-9	1	-9	1	-9	2	-9	1	-9	1	-9	1	-9	1	-9	1	-9	2	-9	1	-9	1	-9	1	-9	1	-9	1	-9	1	-9	1	-9	1	-9	1	-9	1	-9	1
21	2	-9	1	-9	1	-9	1	-9	1	-9	1	-9	1	-9	2	-9	1	-9	1	-9	1	-9	1	-9	1	-9	2	-9	1	-9	1	-9	1	-9	1	-9	1	-9	1	-9	1	-9	1	-9	1	-9	1	-9	1
22	2	-9	1	-9	1	-9	1	-9	1	-9	1	-9	1	-9	2	-9	1	-9	1	-9	1	-9	1	-9	1	-9	2	-9	1	-9	1	-9	1	-9	1	-9	1	-9	1	-9	1	-9	1	-9	1	-9	1	-9	1
23	2	-9	1	-9	1	-9	1	-9	1	-9	1	-9	1	-9	2	-9	1	-9	1	-9	1	-9	1	-9	1	-9	2	-9	1	-9	1	-9	1	-9	1	-9	1	-9	1	-9	1	-9	1	-9	1	-9	1	-9	1
24	2	-9	1	-9	1	-9	1	-9	1	-9	1	-9	1	-9	2	-9	1	-9	1	-9	1	-9	1	-9	1	-9	2	-9	1	-9	1	-9	1	-9	1	-9	1	-9	1	-9	1	-9	1	-9	1	-9	1	-9	1
25	2	-9	1	-9	1	-9	1	-9	1	-9	1	-9	1	-9	2	-9	1	-9	1	-9	1	-9	1	-9	1	-9	2	-9	1	-9	1	-9	1	-9	1	-9	1	-9	1	-9	1	-9	1	-9	1	-9	1	-9	1
26	2	-9	1	-9	1	-9	1	-9	1	-9	1	-9	1	-9	2	-9	1	-9	1	-9	1	-9	1	-9	1	-9	2	-9	1	-9	2	-9	1	-9	1	-9	1	-9	1	-9	1	-9	1	-9	1	-9	1	-9	1
27	2	-9	1	-9	1	-9	1	-9	1	-9	1	-9	1	-9	2	-9	1	-9	1	-9	1	-9	1	-9	1	-9	2	-9	1	-9	1	-9	1	-9	1	-9	1	-9	1	-9	1	-9	1	-9	1	-9	1	-9	1
28	2	-9	1	-9	1	-9	1	-9	1	-9	1	-9	1	-9	2	-9	1	-9	1	-9	1	-9	1	-9	1	-9	2	-9	1	-9	1	-9	1	-9	1	-9	1	-9	1	-9	1	-9	1	-9	1	-9	1	-9	1
29	2	-9	1	-9	1	-9	1	-9	1	-9	1	-9	1	-9	2	-9	1	-9	1	-9	1	-9	1	-9	1	-9	2	-9	1	-9	1	-9	1	-9	1	-9	1	-9	1	-9	1	-9	1	-9	1	-9	1	-9	1
30	2	-9	1	-9	1	-9	1	-9	1	-9	1	-9	1	-9	2	-9	1	-9	1	-9	2	-9	1	-9	1	-9	2	-9	1	-9	1	-9	1	-9	1	-9	1	-9	1	-9	1	-9	1	-9	1	-9	1	-9	1
31	2	-9	1	-9	1	-9	1	-9	1	-9	1	-9	1	-9	2	-9	1	-9	1	-9	1	-9	1	-9	1	-9	2	-9	1	-9	1	-9	1	-9	1	-9	1	-9	1	-9	1	-9	1	-9	1	-9	1	-9	1
32	2	-9	1	-9	1	-9	1	-9	1	-9	1	-9	1	-9	2	-9	1	-9	1	-9	1	-9	1	-9	1	-9	2	-9	1	-9	1	-9	1	-9	1	-9	1	-9	1	-9	1	-9	1	-9	1	-9	1	-9	1
33	2	-9	1	-9	1	-9	1	-9	1	-9	1	-9	1	-9	2	-9	1	-9	2	-9	2	-9	1	-9	1	-9	2	-9	1	-9	1	-9	1	-9	1	-9	1	-9	1	-9	1	-9	1	-9	1	-9	1	-9	1
34	2	-9	1	-9	1	-9	1	-9	1	-9	1	-9	1	-9	2	-9	1	-9	1	-9	1	-9	1	-9	1	-9	1	-9	1	-9	1	-9	1	-9	1	-9	1	-9	1	-9	1	-9	1	-9	1	-9	1	-9	1
35	2	-9	1	-9	1	-9	1	-9	1	-9	1	-9	1	-9	2	-9	1	-9	1	-9	1	-9	1	-9	1	-9	2	-9	1	-9	1	-9	1	-9	1	-9	1	-9	1	-9	1	-9	1	-9	1	-9	1	-9	1
36	2	-9	1	-9	1	-9	1	-9	1	-9	1	-9	1	-9	2	-9	1	-9	1	-9	2	-9	1	-9	1	-9	2	-9	1	-9	1	-9	1	-9	1	-9	1	-9	1	-9	1	-9	1	-9	1	-9	1	-9	1
37	2	-9	1	-9	1	-9	1	-9	1	-9	1	-9	1	-9	2	-9	1	-9	1	-9	1	-9	1	-9	1	-9	2	-9	1	-9	1	-9	1	-9	1	-9	1	-9	1	-9	1	-9	1	-9	1	-9	1	-9	1
38	2	-9	1	-9	1	-9	1	-9	1	-9	1	-9	1	-9	2	-9	1	-9	1	-9	1	-9	1	-9	1	-9	2	-9	1	-9	1	-9	1	-9	1	-9	1	-9	1	-9	1	-9	1	-9	1	-9	1	-9	1
[truncated: 282 more columns]

[truncated: 4 more sheets: 9%, 10%, 17%, 6%_all_data]
